# Supplementary material for: Interaction of a Densovirus with Glycans of the Peritrophic Matrix Mediates Oral Infection of the Lepidopteran Pest Spodoptera frugiperda
Source: MDPI journal article supplement (doi:10.3390/v11090870), 2019-09-17
Supplement: s1 [file s1]

| Name                   | Description                                                      | #GO | GO IDs                                                                                                                                                                                                                                                                                                                                                                                                               | GO Names                                                                                                                                                                                                                                                                                                                                                                                                                                                                                                                                                                                                                                                                                                                                                                                                                                                                                                                                                                                                                                                                                              |
|------------------------|------------------------------------------------------------------|-----|----------------------------------------------------------------------------------------------------------------------------------------------------------------------------------------------------------------------------------------------------------------------------------------------------------------------------------------------------------------------------------------------------------------------|-------------------------------------------------------------------------------------------------------------------------------------------------------------------------------------------------------------------------------------------------------------------------------------------------------------------------------------------------------------------------------------------------------------------------------------------------------------------------------------------------------------------------------------------------------------------------------------------------------------------------------------------------------------------------------------------------------------------------------------------------------------------------------------------------------------------------------------------------------------------------------------------------------------------------------------------------------------------------------------------------------------------------------------------------------------------------------------------------------|
| GSSPFG00022879001-PA   | 14-3-3 protein zeta isoform x1                                   | 2   | C:GO:0005737; F:GO:0019904                                                                                                                                                                                                                                                                                                                                                                                           | C:cytoplasm; F:protein domain specific binding                                                                                                                                                                                                                                                                                                                                                                                                                                                                                                                                                                                                                                                                                                                                                                                                                                                                                                                                                                                                                                                        |
| GSSPFG00006068001-PA   | 40s ribosomal protein s11                                        | 3   | F:GO:0003735; C:GO:0005840; P:GO:0006412                                                                                                                                                                                                                                                                                                                                                                             | F:structural constituent of ribosome; C:ribosome; P:translation                                                                                                                                                                                                                                                                                                                                                                                                                                                                                                                                                                                                                                                                                                                                                                                                                                                                                                                                                                                                                                       |
| GSSPFG00003276001-PA   | 40s ribosomal protein s14                                        | 3   | F:GO:0003735; P:GO:0006412; C:GO:0022627                                                                                                                                                                                                                                                                                                                                                                             | F:structural constituent of ribosome; P:translation; C:cytosolic small ribosomal subunit                                                                                                                                                                                                                                                                                                                                                                                                                                                                                                                                                                                                                                                                                                                                                                                                                                                                                                                                                                                                              |
| GSSPFG00019839001-PA   | 40s ribosomal protein s23                                        | 4   | F:GO:0003677; F:GO:0003735; P:GO:0006412; C:GO:0015935                                                                                                                                                                                                                                                                                                                                                               | F:DNA binding; F:structural constituent of ribosome; P:translation; C:small ribosomal subunit                                                                                                                                                                                                                                                                                                                                                                                                                                                                                                                                                                                                                                                                                                                                                                                                                                                                                                                                                                                                         |
| GSSPFG00014527001-PA   | 60s ribosomal protein l10a                                       | 4   | F:GO:0003723; F:GO:0003735; P:GO:0006412; C:GO:0015934                                                                                                                                                                                                                                                                                                                                                               | F:RNA binding; F:structural constituent of ribosome; P:translation; C:large ribosomal subunit                                                                                                                                                                                                                                                                                                                                                                                                                                                                                                                                                                                                                                                                                                                                                                                                                                                                                                                                                                                                         |
| GSSPFG00007050001-PA   | 60s ribosomal protein l10a                                       | 4   | F:GO:0003723; F:GO:0003735; P:GO:0006412; C:GO:0015934                                                                                                                                                                                                                                                                                                                                                               | F:RNA binding; F:structural constituent of ribosome; P:translation; C:large ribosomal subunit                                                                                                                                                                                                                                                                                                                                                                                                                                                                                                                                                                                                                                                                                                                                                                                                                                                                                                                                                                                                         |
| GSSPFG00012069001.3-PA | actin-related protein 3                                          | 21  | F:GO:0003779; F:GO:0005200; F:GO:0005524; C:GO:0005884; C:GO:0005885; P:GO:0006886; P:GO:0006909; P:GO:0007413; P:GO:0007520; P:GO:0010592; P:GO:0022416; C:GO:0030027; P:GO:0030037; P:GO:0030589; P:GO:0030713; P:GO:0034314; P:GO:0045747; P:GO:0045887; P:GO:0051491; P:GO:0072553; P:GO:0097320                                                                                                                 | F:actin binding; F:structural constituent of cytoskeleton; F:ATP binding; C:actin filament; C:Arp2/3 protein complex; P:intracellular protein transport; P:phagocytosis; P:axonal fasciculation; P:myoblast fusion; P:positive regulation of lamellipodium assembly; P:chaeta development; C:lamellipodium; P:actin filament reorganization involved in cell cycle; P:pseudocleavage involved in syncytial blastoderm formation; P:ovarian follicle cell stalk formation; P:Arp2/3 complex-mediated actin nucleation; P:positive regulation of Notch signaling pathway; P:positive regulation of synaptic growth at neuromuscular junction; P:positive regulation of filopodium assembly; P:terminal button organization; P:plasma membrane tubulation                                                                                                                                                                                                                                                                                                                                                |
| GSSPFG00014383001-PA   | aldo-keto reductase                                              | 2   | F:GO:0016491; P:GO:0055114                                                                                                                                                                                                                                                                                                                                                                                           | F:oxidoreductase activity; P:oxidation-reduction process                                                                                                                                                                                                                                                                                                                                                                                                                                                                                                                                                                                                                                                                                                                                                                                                                                                                                                                                                                                                                                              |
| GSSPFG00004769001-PA   | cadherin-87a                                                     | 2   | P:GO:0007155; C:GO:0016020                                                                                                                                                                                                                                                                                                                                                                                           | P:cell adhesion; C:membrane                                                                                                                                                                                                                                                                                                                                                                                                                                                                                                                                                                                                                                                                                                                                                                                                                                                                                                                                                                                                                                                                           |
| GSSPFG00002450001-PA   | carboxylesterase                                                 | 2   | P:GO:0008152; F:GO:0016787                                                                                                                                                                                                                                                                                                                                                                                           | P:metabolic process; F:hydrolase activity                                                                                                                                                                                                                                                                                                                                                                                                                                                                                                                                                                                                                                                                                                                                                                                                                                                                                                                                                                                                                                                             |
| GSSPFG00030094001-PA   | carboxypeptidase b-like                                          | 1   | F:GO:0004180                                                                                                                                                                                                                                                                                                                                                                                                         | F:carboxypeptidase activity                                                                                                                                                                                                                                                                                                                                                                                                                                                                                                                                                                                                                                                                                                                                                                                                                                                                                                                                                                                                                                                                           |
| GSSPFG00006714001-PA   | catalase                                                         | 13  | F:GO:0004096; F:GO:0005515; P:GO:0006979; P:GO:0009987; F:GO:0020037; C:GO:0043231; P:GO:0044238; P:GO:0044260; C:GO:0044444; F:GO:0046872; P:GO:0050794; P:GO:0055114; P:GO:1901360                                                                                                                                                                                                                                 | F:catalase activity; F:protein binding; P:response to oxidative stress; P:cellular process; F:heme binding; C:intracellular membrane-bounded organelle; P:primary metabolic process; P:cellular macromolecule metabolic process; C:cytoplasmic part; F:metal ion binding; P:regulation of cellular process; P:oxidation-reduction process; P:organic cyclic compound metabolic process                                                                                                                                                                                                                                                                                                                                                                                                                                                                                                                                                                                                                                                                                                                |
| GSSPFG00030477001.4-PA | catalase                                                         | 29  | F:GO:0000981; F:GO:0001158; P:GO:0003007; F:GO:0004096; F:GO:0004102; C:GO:0005634; C:GO:0005777; C:GO:0005891; P:GO:0007274; P:GO:0007517; P:GO:0008292; F:GO:0008332; P:GO:0008340; P:GO:0016339; F:GO:0020037; P:GO:0035206; P:GO:0038001; P:GO:0042542; P:GO:0042673; P:GO:0042682; P:GO:0042744; P:GO:0045471; P:GO:0045676; P:GO:0045944; F:GO:0046872; P:GO:0048813; P:GO:0055114; P:GO:0070509; P:GO:0070588 | F:DNA-binding transcription factor activity, RNA polymerase II-specific; F:enhancer sequence-specific DNA binding; P:heart morphogenesis; F:catalase activity; F:choline O-acetyltransferase activity; C:nucleus; C:peroxisome; C:voltage-gated calcium channel complex; P:neuromuscular synaptic transmission; P:muscle organ development; P:acetylcholine biosynthetic process; F:low voltage-gated calcium channel activity; P:determination of adult lifespan; P:calcium-dependent cell-cell adhesion via plasma membrane cell adhesion molecules; F:heme binding; P:regulation of hemocyte proliferation; P:paracrine signaling; P:response to hydrogen peroxide; P:regulation of retinal cone cell fate specification; P:regulation of compound eye cone cell fate specification; P:hydrogen peroxide catabolic process; P:response to ethanol; P:regulation of R7 cell differentiation; P:positive regulation of transcription by RNA polymerase II; F:metal ion binding; P:dendrite morphogenesis; P:oxidation-reduction process; P:calcium ion import; P:calcium ion transmembrane transport |
| GSSPFG00006818001.1-PA | cd63 antigen                                                     | 1   | C:GO:0016021                                                                                                                                                                                                                                                                                                                                                                                                         | C:integral component of membrane                                                                                                                                                                                                                                                                                                                                                                                                                                                                                                                                                                                                                                                                                                                                                                                                                                                                                                                                                                                                                                                                      |
| GSSPFG00004358001-PA   | cell cycle checkpoint control protein rad9a                      | 3   | P:GO:0000077; P:GO:0006281; C:GO:0030896                                                                                                                                                                                                                                                                                                                                                                             | P:DNA damage checkpoint; P:DNA repair; C:checkpoint clamp complex                                                                                                                                                                                                                                                                                                                                                                                                                                                                                                                                                                                                                                                                                                                                                                                                                                                                                                                                                                                                                                     |
| GSSPFG00008227001.3-PA | chymotrypsin-like protease                                       | 2   | F:GO:0004252; P:GO:0006508                                                                                                                                                                                                                                                                                                                                                                                           | F:serine-type endopeptidase activity; P:proteolysis                                                                                                                                                                                                                                                                                                                                                                                                                                                                                                                                                                                                                                                                                                                                                                                                                                                                                                                                                                                                                                                   |
| GSSPFG00030121001.3-PA | chymotrypsin-like protease                                       | 2   | F:GO:0004252; P:GO:0006508                                                                                                                                                                                                                                                                                                                                                                                           | F:serine-type endopeptidase activity; P:proteolysis                                                                                                                                                                                                                                                                                                                                                                                                                                                                                                                                                                                                                                                                                                                                                                                                                                                                                                                                                                                                                                                   |
| GSSPFG00034359001.3-PA | chymotrypsin-like serine protease                                | 2   | F:GO:0004252; P:GO:0006508                                                                                                                                                                                                                                                                                                                                                                                           | F:serine-type endopeptidase activity; P:proteolysis                                                                                                                                                                                                                                                                                                                                                                                                                                                                                                                                                                                                                                                                                                                                                                                                                                                                                                                                                                                                                                                   |
| GSSPFG00003632001-PA   | complement component 1 q subcomponent-binding mitochondrial      | 1   | C:GO:0005759                                                                                                                                                                                                                                                                                                                                                                                                         | C:mitochondrial matrix                                                                                                                                                                                                                                                                                                                                                                                                                                                                                                                                                                                                                                                                                                                                                                                                                                                                                                                                                                                                                                                                                |
| GSSPFG00022978001.3-PA | cysteine protease atg4d isoform x2                               | 5   | C:GO:0005737; P:GO:0006508; P:GO:0006914; P:GO:0008234; P:GO:0015031                                                                                                                                                                                                                                                                                                                                                 | C:cytoplasm; P:proteolysis; P:autophagy; F:cysteine-type peptidase activity; P:protein transport                                                                                                                                                                                                                                                                                                                                                                                                                                                                                                                                                                                                                                                                                                                                                                                                                                                                                                                                                                                                      |
| GSSPFG00019339001-PA   | delta-aminolevulinic acid dehydratase isoform x2                 | 4   | F:GO:0004655; F:GO:0005524; P:GO:0006779; F:GO:0046872                                                                                                                                                                                                                                                                                                                                                               | F:porphobilinogen synthase activity; F:ATP binding; P:porphyrin-containing compound biosynthetic process; F:metal ion binding                                                                                                                                                                                                                                                                                                                                                                                                                                                                                                                                                                                                                                                                                                                                                                                                                                                                                                                                                                         |
| GSSPFG00009074001-PA   | deoxycytidylate deaminase                                        | 4   | F:GO:0004132; P:GO:0009117; F:GO:0046872; C:GO:0070062                                                                                                                                                                                                                                                                                                                                                               | F:dCMP deaminase activity; P:nucleotide metabolic process; F:metal ion binding; C:extracellular exosome                                                                                                                                                                                                                                                                                                                                                                                                                                                                                                                                                                                                                                                                                                                                                                                                                                                                                                                                                                                               |
| GSSPFG00020627001-PA   | dj-1 beta                                                        | 5   | P:GO:0008344; P:GO:0042775; P:GO:0046626; P:GO:0048640; P:GO:0070301                                                                                                                                                                                                                                                                                                                                                 | P:adult locomotory behavior; P:mitochondrial ATP synthesis coupled electron transport; P:regulation of insulin receptor signaling pathway; P:negative regulation of developmental growth; P:cellular response to hydrogen peroxide                                                                                                                                                                                                                                                                                                                                                                                                                                                                                                                                                                                                                                                                                                                                                                                                                                                                    |
| GSSPFG00025486001.2-PA | dna (cytosine-5)-methyltransferase -like isoform x1              | 6   | F:GO:0003677; F:GO:0003682; F:GO:0003886; C:GO:0005634; F:GO:0008270; P:GO:0090116                                                                                                                                                                                                                                                                                                                                   | F:DNA binding; F:chromatin binding; F:DNA (cytosine-5-)-methyltransferase activity; C:nucleus; F:zinc ion binding; P:C-5 methylation of cytosine                                                                                                                                                                                                                                                                                                                                                                                                                                                                                                                                                                                                                                                                                                                                                                                                                                                                                                                                                      |
| GSSPFG00005701001-PA   | dopamine n-acetyltransferase-like                                | 2   | F:GO:0008080; P:GO:0008152                                                                                                                                                                                                                                                                                                                                                                                           | F:N-acetyltransferase activity; P:metabolic process                                                                                                                                                                                                                                                                                                                                                                                                                                                                                                                                                                                                                                                                                                                                                                                                                                                                                                                                                                                                                                                   |
| GSSPFG00033485001-PA   | elongation factor 1 delta                                        | 3   | F:GO:0003746; C:GO:0005853; P:GO:0006414                                                                                                                                                                                                                                                                                                                                                                             | F:translation elongation factor activity; C:eukaryotic translation elongation factor 1 complex; P:translational elongation                                                                                                                                                                                                                                                                                                                                                                                                                                                                                                                                                                                                                                                                                                                                                                                                                                                                                                                                                                            |
| GSSPFG00022059001-PA   | glucosamine-6-phosphate isomerase-like isoform x1                | 7   | F:GO:0004342; C:GO:0005737; P:GO:0005975; P:GO:0006043; P:GO:0006044; P:GO:0006091; F:GO:0016787                                                                                                                                                                                                                                                                                                                     | F:glucosamine-6-phosphate deaminase activity; C:cytoplasm; P:carbohydrate metabolic process; P:glucosamine catabolic process; P:N-acetylglucosamine metabolic process; P:generation of precursor metabolites and energy; F:hydrolase activity                                                                                                                                                                                                                                                                                                                                                                                                                                                                                                                                                                                                                                                                                                                                                                                                                                                         |
| GSSPFG00009170001.5-PA | glutathione s-transferase theta-1-like                           | 2   | F:GO:0004364; P:GO:0008152                                                                                                                                                                                                                                                                                                                                                                                           | F:glutathione transferase activity; P:metabolic process                                                                                                                                                                                                                                                                                                                                                                                                                                                                                                                                                                                                                                                                                                                                                                                                                                                                                                                                                                                                                                               |
| GSSPFG00007670001-PA   | growth arrest and dna damage-inducible protein gadd45 alpha-like | 3   | C:GO:0005634; P:GO:0006950; P:GO:0051726                                                                                                                                                                                                                                                                                                                                                                             | C:nucleus; P:response to stress; P:regulation of cell cycle                                                                                                                                                                                                                                                                                                                                                                                                                                                                                                                                                                                                                                                                                                                                                                                                                                                                                                                                                                                                                                           |
| GSSPFG00021491001.3-PA | growth hormone-inducible transmembrane                           | 1   | C:GO:0016021                                                                                                                                                                                                                                                                                                                                                                                                         | C:integral component of membrane                                                                                                                                                                                                                                                                                                                                                                                                                                                                                                                                                                                                                                                                                                                                                                                                                                                                                                                                                                                                                                                                      |
| GSSPFG00002254001-PA   | haspin-like protein                                              | 3   | F:GO:0004672; F:GO:0005524; P:GO:0006468                                                                                                                                                                                                                                                                                                                                                                             | F:protein kinase activity; F:ATP binding; P:protein phosphorylation                                                                                                                                                                                                                                                                                                                                                                                                                                                                                                                                                                                                                                                                                                                                                                                                                                                                                                                                                                                                                                   |
| GSSPFG00004200001.1-PA | hatching enzyme-like protein                                     | 3   | F:GO:0004222; P:GO:0006508; F:GO:0008270                                                                                                                                                                                                                                                                                                                                                                             | F:metalloendopeptidase activity; P:proteolysis; F:zinc ion binding                                                                                                                                                                                                                                                                                                                                                                                                                                                                                                                                                                                                                                                                                                                                                                                                                                                                                                                                                                                                                                    |

|                        |                                                          |    |                                                                                                                                                          |                                                                                                                                                                                                                                                                                                             |
|------------------------|----------------------------------------------------------|----|----------------------------------------------------------------------------------------------------------------------------------------------------------|-------------------------------------------------------------------------------------------------------------------------------------------------------------------------------------------------------------------------------------------------------------------------------------------------------------|
| GSSPFG0001595001.3-PA  | heat shock protein                                       | 1  | F:GO:0005212                                                                                                                                             | F:structural constituent of eye lens                                                                                                                                                                                                                                                                        |
| GSSPFG00026171001-PA   | high affinity copper uptake protein 1 isoform x2         | 3  | F:GO:0005375; C:GO:0016021; P:GO:0035434                                                                                                                 | F:copper ion transmembrane transporter activity; C:integral component of membrane; P:copper ion transmembrane transport                                                                                                                                                                                     |
| GSSPFG00028706001-PA   | histone                                                  | 4  | C:GO:0000786; F:GO:0003677; C:GO:0005634; F:GO:0046982                                                                                                   | C:nucleosome; F:DNA binding; C:nucleus; F:protein heterodimerization activity                                                                                                                                                                                                                               |
| GSSPFG00031885001-PA   | ischemia reperfusion inducible protein                   | 4  | F:GO:0003725; P:GO:0006412; F:GO:0016740; F:GO:0045182                                                                                                   | F:double-stranded RNA binding; P:translation; F:transferase activity; F:translation regulator activity                                                                                                                                                                                                      |
| GSSPFG00009739001.1-PA | leukocyte receptor cluster member 4 protein              | 1  | C:GO:0016021                                                                                                                                             | C:integral component of membrane                                                                                                                                                                                                                                                                            |
| GSSPFG00009826001-PA   | map kinase-interacting serine threonine-protein kinase 1 | 11 | F:GO:0004674; F:GO:0005524; C:GO:0005635; C:GO:0005813; C:GO:0005829; C:GO:0005874; P:GO:0006468; P:GO:0007017; P:GO:0040008; P:GO:0046580; F:GO:0051019 | F:protein serine/threonine kinase activity; F:ATP binding; C:nuclear envelope; C:centrosome; C:cytosol; C:microtubule; P:protein phosphorylation; P:microtubule-based process; P:regulation of growth; P:negative regulation of Ras protein signal transduction; F:mitogen-activated protein kinase binding |
| GSSPFG00011895001-PA   | mitochondrial dicarboxylate carrier                      | 2  | P:GO:0006810; C:GO:0016021                                                                                                                               | P:transport; C:integral component of membrane                                                                                                                                                                                                                                                               |
| GSSPFG00001220001-PA   | organic cation transporter protein isoform x1            | 3  | C:GO:0016021; F:GO:0022857; P:GO:0055085                                                                                                                 | C:integral component of membrane; F:transmembrane transporter activity; P:transmembrane transport                                                                                                                                                                                                           |
| GSSPFG00003126001.3-PA | partial                                                  | 3  | F:GO:0003700; P:GO:0006355; F:GO:0043565                                                                                                                 | F:DNA-binding transcription factor activity; P:regulation of transcription, DNA-templated; F:sequence-specific DNA binding                                                                                                                                                                                  |
| GSSPFG00002429001-PA   | pleckstrin homology domain-containing family m member 1  | 3  | C:GO:0005622; F:GO:0008270; P:GO:0035556                                                                                                                 | C:intracellular; F:zinc ion binding; P:intracellular signal transduction                                                                                                                                                                                                                                    |
| GSSPFG00031628001-PA   | probable phosphoserine aminotransferase                  | 2  | F:GO:0004648; P:GO:0006564                                                                                                                               | F:O-phospho-L-serine:2-oxoglutarate aminotransferase activity; P:L-serine biosynthetic process                                                                                                                                                                                                              |
| GSSPFG00013235001-PA   | pyruvate mitochondrial isoform x1                        | 8  | F:GO:0003677; F:GO:0004075; F:GO:0004736; F:GO:0005524; P:GO:0006090; P:GO:0006094; F:GO:0009374; F:GO:0046872                                           | F:DNA binding; F:biotin carboxylase activity; F:pyruvate carboxylase activity; F:ATP binding; P:pyruvate metabolic process; P:gluconeogenesis; F:biotin binding; F:metal ion binding                                                                                                                        |
| GSSPFG00020427001-PA   | ribosomal protein l13                                    | 3  | F:GO:0003735; C:GO:0005840; P:GO:0006412                                                                                                                 | F:structural constituent of ribosome; C:ribosome; P:translation                                                                                                                                                                                                                                             |
| GSSPFG00024299001-PA   | ribosomal protein l18a                                   | 3  | F:GO:0003735; C:GO:0005840; P:GO:0006412                                                                                                                 | F:structural constituent of ribosome; C:ribosome; P:translation                                                                                                                                                                                                                                             |
| GSSPFG00002705001.1-PA | ribosomal protein s2                                     | 4  | F:GO:0003723; F:GO:0003735; P:GO:0006412; C:GO:0015935                                                                                                   | F:RNA binding; F:structural constituent of ribosome; P:translation; C:small ribosomal subunit                                                                                                                                                                                                               |
| GSSPFG00023951001-PA   | serine threonine-protein phosphatase alpha-2 isoform     | 2  | F:GO:0004721; P:GO:0006470                                                                                                                               | F:phosphoprotein phosphatase activity; P:protein dephosphorylation                                                                                                                                                                                                                                          |
| GSSPFG00000284001-PA   | serine threonine-protein phosphatase rdgc-like           | 6  | F:GO:0004721; F:GO:0005506; F:GO:0005509; P:GO:0006470; F:GO:0030145; P:GO:0050906                                                                       | F:phosphoprotein phosphatase activity; F:iron ion binding; F:calcium ion binding; P:protein dephosphorylation; F:manganese ion binding; P:detection of stimulus involved in sensory perception                                                                                                              |
| GSSPFG00001324001.1-PA | s-formylglutathione hydrolase                            | 4  | C:GO:0005737; F:GO:0018738; C:GO:0043231; P:GO:0046294                                                                                                   | C:cytoplasm; F:S-formylglutathione hydrolase activity; C:intracellular membrane-bounded organelle; P:formaldehyde catabolic process                                                                                                                                                                         |
| GSSPFG00025156001-PA   | signal peptidase complex subunit 3-like                  | 4  | C:GO:0005787; P:GO:0006465; F:GO:0008233; C:GO:0016021                                                                                                   | C:signal peptidase complex; P:signal peptide processing; F:peptidase activity; C:integral component of membrane                                                                                                                                                                                             |
| GSSPFG00029082001.6-PA | small heat shock protein                                 | 2  | F:GO:0005212; C:GO:0005840                                                                                                                               | F:structural constituent of eye lens; C:ribosome                                                                                                                                                                                                                                                            |
| GSSPFG00010112001-PA   | succinyl-ligase                                          | 4  | F:GO:0005524; P:GO:0008152; F:GO:0016874; F:GO:0046872                                                                                                   | F:ATP binding; P:metabolic process; F:ligase activity; F:metal ion binding                                                                                                                                                                                                                                  |
| GSSPFG00011227001-PA   | synaptic vesicle glycoprotein 2b                         | 4  | F:GO:0008270; C:GO:0016021; F:GO:0022857; P:GO:0055085                                                                                                   | F:zinc ion binding; C:integral component of membrane; F:transmembrane transporter activity; P:transmembrane transport                                                                                                                                                                                       |
| GSSPFG00007437001.3-PA | transcription factor kayak isoform x3                    | 3  | F:GO:0003700; P:GO:0006357; F:GO:0043565                                                                                                                 | F:DNA-binding transcription factor activity; P:regulation of transcription by RNA polymerase II; F:sequence-specific DNA binding                                                                                                                                                                            |
| GSSPFG00020171001-PA   | translocon-associated protein subunit beta               | 4  | C:GO:0005789; F:GO:0008519; C:GO:0016021; P:GO:0072488                                                                                                   | C:endoplasmic reticulum membrane; F:ammonium transmembrane transporter activity; C:integral component of membrane; P:ammonium transmembrane transport                                                                                                                                                       |
| GSSPFG00021205001.4-PA | trypsin-like protease                                    | 2  | F:GO:0004252; P:GO:0006508                                                                                                                               | F:serine-type endopeptidase activity; P:proteolysis                                                                                                                                                                                                                                                         |
| GSSPFG00028708001.1-PA | uncharacterized protein loc100878113                     | 3  | P:GO:0006413; C:GO:0032991; C:GO:0044444                                                                                                                 | P:translational initiation; C:protein-containing complex; C:cytoplasmic part                                                                                                                                                                                                                                |
| GSSPFG00028709001.1-PA | uncharacterized protein loc100878113                     | 3  | P:GO:0006413; C:GO:0032991; C:GO:0044444                                                                                                                 | P:translational initiation; C:protein-containing complex; C:cytoplasmic part                                                                                                                                                                                                                                |
| GSSPFG00017701001-PA   | vesicle transport protein got1b                          | 2  | P:GO:0006457; P:GO:0016192                                                                                                                               | P:protein folding; P:vesicle-mediated transport                                                                                                                                                                                                                                                             |
| GSSPFG00009357001-PA   | vesicle transport protein got1b                          | 2  | P:GO:0006457; P:GO:0016192                                                                                                                               | P:protein folding; P:vesicle-mediated transport                                                                                                                                                                                                                                                             |
| GSSPFG00027141001-PA   | v-type proton atpase catalytic subunit a                 | 5  | F:GO:0005524; P:GO:0015991; C:GO:0033180; P:GO:0046034; F:GO:0046961                                                                                     | F:ATP binding; P:ATP hydrolysis coupled proton transport; C:proton-transporting V-type ATPase, V1 domain; P:ATP metabolic process; F:proton-transporting ATPase activity, rotational mechanism                                                                                                              |
| GSSPFG00000066001-PA   | v-type proton atpase subunit e 2-like                    | 5  | P:GO:0008152; F:GO:0015078; P:GO:0015991; F:GO:0016787; C:GO:0033179                                                                                     | P:metabolic process; F:proton transmembrane transporter activity; P:ATP hydrolysis coupled proton transport; F:hydrolase activity; C:proton-transporting V-type ATPase, V0 domain                                                                                                                           |
| GSSPFG00002721001-PA   | v-type proton atpase subunit e 2-like                    | 5  | P:GO:0008152; F:GO:0015078; P:GO:0015991; F:GO:0016787; C:GO:0033179                                                                                     | P:metabolic process; F:proton transmembrane transporter activity; P:ATP hydrolysis coupled proton transport; F:hydrolase activity; C:proton-transporting V-type ATPase, V0 domain                                                                                                                           |
| GSSPFG00032564001-PA   | v-type proton atpase subunit g                           | 5  | C:GO:0016324; C:GO:0016471; F:GO:0042626; P:GO:0055085; P:GO:1902600                                                                                     | C:apical plasma membrane; C:vacuolar proton-transporting V-type ATPase complex; F:ATPase activity, coupled to transmembrane movement of substances; P:transmembrane transport; P:proton transmembrane transport                                                                                             |
| GSSPFG00017650001-PA   | zinc carboxypeptidase-like                               | 2  | F:GO:0004180; F:GO:0046872                                                                                                                               | F:carboxypeptidase activity; F:metal ion binding                                                                                                                                                                                                                                                            |
