# Supplementary material for: Interaction of a Densovirus with Glycans of the Peritrophic Matrix Mediates Oral Infection of the Lepidopteran Pest Spodoptera frugiperda
Source: MDPI journal article supplement (doi:10.3390/v11090870), 2019-09-17
Supplement: s1 [file s1]

| Name                   | Description                                                | #GO | GO IDs                                                                                                                                                                                                                                                                                                                                                                                                                                                                                                                                                                                       | GO Names                                                                                                                                                                                                                                                                                                                                                                                                                                                                                                                                                                                                                                                                                                                                                                                                                                                                                                                                                                                                                                                                                                                                                                                                                                                                                                                                                                                                                                                                                                                                    |
|------------------------|------------------------------------------------------------|-----|----------------------------------------------------------------------------------------------------------------------------------------------------------------------------------------------------------------------------------------------------------------------------------------------------------------------------------------------------------------------------------------------------------------------------------------------------------------------------------------------------------------------------------------------------------------------------------------------|---------------------------------------------------------------------------------------------------------------------------------------------------------------------------------------------------------------------------------------------------------------------------------------------------------------------------------------------------------------------------------------------------------------------------------------------------------------------------------------------------------------------------------------------------------------------------------------------------------------------------------------------------------------------------------------------------------------------------------------------------------------------------------------------------------------------------------------------------------------------------------------------------------------------------------------------------------------------------------------------------------------------------------------------------------------------------------------------------------------------------------------------------------------------------------------------------------------------------------------------------------------------------------------------------------------------------------------------------------------------------------------------------------------------------------------------------------------------------------------------------------------------------------------------|
| GSSPFG00020857001.3-PA | 14-3-3 protein epsilon isoform x1                          | 41  | P:GO:0000075; P:GO:0000086; P:GO:0001764; P:GO:0003064; F:GO:0003723; F:GO:0004497; C:GO:0005739; C:GO:0005829; C:GO:0005871; C:GO:0005925; P:GO:0006367; P:GO:0006605; P:GO:0007264; F:GO:0015459; P:GO:0016032; F:GO:0019904; P:GO:0021762; P:GO:0021766; P:GO:0021987; F:GO:0023026; C:GO:0030424; C:GO:0030659; F:GO:0031625; P:GO:0035329; C:GO:0042470; F:GO:0042826; P:GO:0043281; F:GO:0044325; F:GO:0046982; P:GO:0048011; F:GO:0050815; P:GO:0055114; P:GO:0060306; C:GO:0070062; P:GO:0086013; P:GO:0086091; P:GO:0097193; P:GO:1900034; P:GO:1900740; P:GO:1901016; P:GO:1902309 | P:cell cycle checkpoint; P:G2/M transition of mitotic cell cycle; P:neuron migration; P:regulation of heart rate by hormone; F:RNA binding; F:monooxygenase activity; C:mitochondrion; C:cytosol; C:kinesin complex; C:focal adhesion; P:transcription initiation from RNA polymerase II promoter; P:protein targeting; P:small GTPase mediated signal transduction; F:potassium channel regulator activity; P:viral process; F:protein domain specific binding; P:substantia nigra development; P:hippocampus development; P:cerebral cortex development; F:MHC class II protein complex binding; C:axon; C:cytoplasmic vesicle membrane; F:ubiquitin protein ligase binding; P:hippo signaling; C:melanosome; F:histone deacetylase binding; P:regulation of cysteine-type endopeptidase activity involved in apoptotic process; F:ion channel binding; F:protein heterodimerization activity; P:neurotrophin TRK receptor signaling pathway; F:phosphoserine residue binding; P:oxidation-reduction process; P:regulation of membrane repolarization; C:extracellular exosome; P:membrane repolarization during cardiac muscle cell action potential; P:regulation of heart rate by cardiac conduction; P:intrinsic apoptotic signaling pathway; P:regulation of cellular response to heat; P:positive regulation of protein insertion into mitochondrial membrane involved in apoptotic signaling pathway; P:regulation of potassium ion transmembrane transporter activity; P:negative regulation of peptidyl-serine dephosphorylation |
| GSSPFG00022879001-PA   | 14-3-3 protein zeta isoform x1                             | 2   | C:GO:0005737; F:GO:0019904                                                                                                                                                                                                                                                                                                                                                                                                                                                                                                                                                                   | C:cytoplasm; F:protein domain specific binding                                                                                                                                                                                                                                                                                                                                                                                                                                                                                                                                                                                                                                                                                                                                                                                                                                                                                                                                                                                                                                                                                                                                                                                                                                                                                                                                                                                                                                                                                              |
| GSSPFG00016664001.1-PA | af361483_1chymotrypsin inhibitor ci-8a                     | 3   | C:GO:0005615; P:GO:0010466; F:GO:0030414                                                                                                                                                                                                                                                                                                                                                                                                                                                                                                                                                     | C:extracellular space; P:negative regulation of peptidase activity; F:peptidase inhibitor activity                                                                                                                                                                                                                                                                                                                                                                                                                                                                                                                                                                                                                                                                                                                                                                                                                                                                                                                                                                                                                                                                                                                                                                                                                                                                                                                                                                                                                                          |
| GSSPFG00012908001.3-PA | alkaline a-like                                            | 2   | F:GO:0004252; P:GO:0006508                                                                                                                                                                                                                                                                                                                                                                                                                                                                                                                                                                   | F:serine-type endopeptidase activity; P:proteolysis                                                                                                                                                                                                                                                                                                                                                                                                                                                                                                                                                                                                                                                                                                                                                                                                                                                                                                                                                                                                                                                                                                                                                                                                                                                                                                                                                                                                                                                                                         |
| GSSPFG00019582001.4-PA | alkaline nuclease                                          | 4   | F:GO:0003676; P:GO:0008152; F:GO:0016787; F:GO:0046872                                                                                                                                                                                                                                                                                                                                                                                                                                                                                                                                       | F:nucleic acid binding; P:metabolic process; F:hydrolase activity; F:metal ion binding                                                                                                                                                                                                                                                                                                                                                                                                                                                                                                                                                                                                                                                                                                                                                                                                                                                                                                                                                                                                                                                                                                                                                                                                                                                                                                                                                                                                                                                      |
| GSSPFG00004452001-PA   | alpha amylase                                              | 3   | P:GO:0005975; F:GO:0016787; F:GO:0043169                                                                                                                                                                                                                                                                                                                                                                                                                                                                                                                                                     | P:carbohydrate metabolic process; F:hydrolase activity; F:cation binding                                                                                                                                                                                                                                                                                                                                                                                                                                                                                                                                                                                                                                                                                                                                                                                                                                                                                                                                                                                                                                                                                                                                                                                                                                                                                                                                                                                                                                                                    |
| GSSPFG00027172001.1-PA | alpha-amylase 2                                            | 8   | F:GO:0004556; P:GO:0005975; P:GO:0006567; F:GO:0008890; P:GO:0009058; F:GO:0016874; F:GO:0030170; F:GO:0043169                                                                                                                                                                                                                                                                                                                                                                                                                                                                               | F:alpha-amylase activity; P:carbohydrate metabolic process; P:threonine catabolic process; F:glycine C-acetyltransferase activity; P:biosynthetic process; F:ligase activity; F:pyridoxal phosphate binding; F:cation binding                                                                                                                                                                                                                                                                                                                                                                                                                                                                                                                                                                                                                                                                                                                                                                                                                                                                                                                                                                                                                                                                                                                                                                                                                                                                                                               |
| GSSPFG00000424001-PA   | alpha-amylase 4n-like                                      | 3   | F:GO:0004556; P:GO:0005975; F:GO:0043169                                                                                                                                                                                                                                                                                                                                                                                                                                                                                                                                                     | F:alpha-amylase activity; P:carbohydrate metabolic process; F:cation binding                                                                                                                                                                                                                                                                                                                                                                                                                                                                                                                                                                                                                                                                                                                                                                                                                                                                                                                                                                                                                                                                                                                                                                                                                                                                                                                                                                                                                                                                |
| GSSPFG00025752001.1-PA | aminopeptidase n                                           | 5   | F:GO:0004177; P:GO:0006508; F:GO:0008237; F:GO:0008270; C:GO:0016020                                                                                                                                                                                                                                                                                                                                                                                                                                                                                                                         | F:aminopeptidase activity; P:proteolysis; F:metallopeptidase activity; F:zinc ion binding; C:membrane                                                                                                                                                                                                                                                                                                                                                                                                                                                                                                                                                                                                                                                                                                                                                                                                                                                                                                                                                                                                                                                                                                                                                                                                                                                                                                                                                                                                                                       |
| GSSPFG00004595001-PA   | aminopeptidase n                                           | 2   | F:GO:0046872; F:GO:0070011                                                                                                                                                                                                                                                                                                                                                                                                                                                                                                                                                                   | F:metal ion binding; F:peptidase activity, acting on L-amino acid peptides                                                                                                                                                                                                                                                                                                                                                                                                                                                                                                                                                                                                                                                                                                                                                                                                                                                                                                                                                                                                                                                                                                                                                                                                                                                                                                                                                                                                                                                                  |
| GSSPFG00026992001-PA   | aminopeptidase n                                           | 5   | F:GO:0004177; P:GO:0006508; F:GO:0008237; F:GO:0008270; C:GO:0016020                                                                                                                                                                                                                                                                                                                                                                                                                                                                                                                         | F:aminopeptidase activity; P:proteolysis; F:metallopeptidase activity; F:zinc ion binding; C:membrane                                                                                                                                                                                                                                                                                                                                                                                                                                                                                                                                                                                                                                                                                                                                                                                                                                                                                                                                                                                                                                                                                                                                                                                                                                                                                                                                                                                                                                       |
| GSSPFG00019131001-PA   | aminopeptidase n                                           | 5   | F:GO:0004177; P:GO:0006508; F:GO:0008237; F:GO:0008270; C:GO:0016020                                                                                                                                                                                                                                                                                                                                                                                                                                                                                                                         | F:aminopeptidase activity; P:proteolysis; F:metallopeptidase activity; F:zinc ion binding; C:membrane                                                                                                                                                                                                                                                                                                                                                                                                                                                                                                                                                                                                                                                                                                                                                                                                                                                                                                                                                                                                                                                                                                                                                                                                                                                                                                                                                                                                                                       |
| GSSPFG00002605001-PA   | aminopeptidase n1                                          | 4   | F:GO:0004177; P:GO:0006508; F:GO:0008237; F:GO:0008270                                                                                                                                                                                                                                                                                                                                                                                                                                                                                                                                       | F:aminopeptidase activity; P:proteolysis; F:metallopeptidase activity; F:zinc ion binding                                                                                                                                                                                                                                                                                                                                                                                                                                                                                                                                                                                                                                                                                                                                                                                                                                                                                                                                                                                                                                                                                                                                                                                                                                                                                                                                                                                                                                                   |
| GSSPFG00002604001-PA   | aminopeptidase n4                                          | 4   | F:GO:0004177; P:GO:0006508; F:GO:0008237; F:GO:0008270                                                                                                                                                                                                                                                                                                                                                                                                                                                                                                                                       | F:aminopeptidase activity; P:proteolysis; F:metallopeptidase activity; F:zinc ion binding                                                                                                                                                                                                                                                                                                                                                                                                                                                                                                                                                                                                                                                                                                                                                                                                                                                                                                                                                                                                                                                                                                                                                                                                                                                                                                                                                                                                                                                   |
| GSSPFG00006479001.1-PA | aminopeptidase n5                                          | 4   | F:GO:0004177; P:GO:0006508; F:GO:0008237; F:GO:0008270                                                                                                                                                                                                                                                                                                                                                                                                                                                                                                                                       | F:aminopeptidase activity; P:proteolysis; F:metallopeptidase activity; F:zinc ion binding                                                                                                                                                                                                                                                                                                                                                                                                                                                                                                                                                                                                                                                                                                                                                                                                                                                                                                                                                                                                                                                                                                                                                                                                                                                                                                                                                                                                                                                   |
| GSSPFG00027324001-PA   | anhydro-d-fructose reductase-like isoform x3               | 2   | F:GO:0016491; P:GO:0055114                                                                                                                                                                                                                                                                                                                                                                                                                                                                                                                                                                   | F:oxidoreductase activity; P:oxidation-reduction process                                                                                                                                                                                                                                                                                                                                                                                                                                                                                                                                                                                                                                                                                                                                                                                                                                                                                                                                                                                                                                                                                                                                                                                                                                                                                                                                                                                                                                                                                    |
| GSSPFG00022331001.1-PA | apolipoporphins                                            | 7   | F:GO:0005488; P:GO:0006810; P:GO:0009987; P:GO:0033036; C:GO:0044464; P:GO:0051179; P:GO:0065007                                                                                                                                                                                                                                                                                                                                                                                                                                                                                             | F:binding; P:transport; P:cellular process; P:macromolecule localization; C:cell part; P:localization; P:biological regulation                                                                                                                                                                                                                                                                                                                                                                                                                                                                                                                                                                                                                                                                                                                                                                                                                                                                                                                                                                                                                                                                                                                                                                                                                                                                                                                                                                                                              |
| GSSPFG00013898001-PA   | apolipoporphins                                            | 7   | F:GO:0005488; P:GO:0006810; P:GO:0009987; P:GO:0033036; C:GO:0044464; P:GO:0051179; P:GO:0065007                                                                                                                                                                                                                                                                                                                                                                                                                                                                                             | F:binding; P:transport; P:cellular process; P:macromolecule localization; C:cell part; P:localization; P:biological regulation                                                                                                                                                                                                                                                                                                                                                                                                                                                                                                                                                                                                                                                                                                                                                                                                                                                                                                                                                                                                                                                                                                                                                                                                                                                                                                                                                                                                              |
| GSSPFG00000973001-PA   | apolipoprotein d-like protein                              | 2   | C:GO:0005576; F:GO:0031409                                                                                                                                                                                                                                                                                                                                                                                                                                                                                                                                                                   | C:extracellular region; F:pigment binding                                                                                                                                                                                                                                                                                                                                                                                                                                                                                                                                                                                                                                                                                                                                                                                                                                                                                                                                                                                                                                                                                                                                                                                                                                                                                                                                                                                                                                                                                                   |
| GSSPFG00020046001-PA   | arginine kinase                                            | 3   | F:GO:0004054; F:GO:0005524; P:GO:0016310                                                                                                                                                                                                                                                                                                                                                                                                                                                                                                                                                     | F:arginine kinase activity; F:ATP binding; P:phosphorylation                                                                                                                                                                                                                                                                                                                                                                                                                                                                                                                                                                                                                                                                                                                                                                                                                                                                                                                                                                                                                                                                                                                                                                                                                                                                                                                                                                                                                                                                                |
| GSSPFG00017029001-PA   | arylphorin precursor                                       | 2   | C:GO:0005615; F:GO:0045735                                                                                                                                                                                                                                                                                                                                                                                                                                                                                                                                                                   | C:extracellular space; F:nutrient reservoir activity                                                                                                                                                                                                                                                                                                                                                                                                                                                                                                                                                                                                                                                                                                                                                                                                                                                                                                                                                                                                                                                                                                                                                                                                                                                                                                                                                                                                                                                                                        |
| GSSPFG00017028001-PA   | arylphorin precursor                                       | 2   | C:GO:0005615; F:GO:0045735                                                                                                                                                                                                                                                                                                                                                                                                                                                                                                                                                                   | C:extracellular space; F:nutrient reservoir activity                                                                                                                                                                                                                                                                                                                                                                                                                                                                                                                                                                                                                                                                                                                                                                                                                                                                                                                                                                                                                                                                                                                                                                                                                                                                                                                                                                                                                                                                                        |
| GSSPFG00017030001-PA   | arylphorin subunit alpha                                   | 2   | C:GO:0005615; F:GO:0045735                                                                                                                                                                                                                                                                                                                                                                                                                                                                                                                                                                   | C:extracellular space; F:nutrient reservoir activity                                                                                                                                                                                                                                                                                                                                                                                                                                                                                                                                                                                                                                                                                                                                                                                                                                                                                                                                                                                                                                                                                                                                                                                                                                                                                                                                                                                                                                                                                        |
| GSSPFG00017555001.4-PA | atp-binding cassette sub-family a member 5-like isoform x1 | 6   | F:GO:0005215; F:GO:0005524; P:GO:0006810; P:GO:0008152; C:GO:0016021; F:GO:0016887                                                                                                                                                                                                                                                                                                                                                                                                                                                                                                           | F:transporter activity; F:ATP binding; P:transport; P:metabolic process; C:integral component of membrane; F:ATPase activity                                                                                                                                                                                                                                                                                                                                                                                                                                                                                                                                                                                                                                                                                                                                                                                                                                                                                                                                                                                                                                                                                                                                                                                                                                                                                                                                                                                                                |
| GSSPFG00031214001-PA   | beta- partial                                              | 24  | C:GO:0000790; F:GO:0000978; F:GO:0000980; P:GO:0001895; F:GO:0005524; C:GO:0005829; C:GO:0005886; C:GO:0005925; F:GO:0019894; P:GO:0021762; C:GO:0030863; F:GO:0030957; F:GO:0031492; C:GO:0035267; C:GO:0036464; F:GO:0042802; P:GO:0043044; C:GO:0043209; F:GO:0050998; C:GO:0070062; P:GO:0070527; C:GO:0070688; C:GO:0072562; C:GO:0097433                                                                                                                                                                                                                                               | C:nuclear chromatin; F:RNA polymerase II proximal promoter sequence-specific DNA binding; F:RNA polymerase II distal enhancer sequence-specific DNA binding; P:retina homeostasis; F:ATP binding; C:cytosol; C:plasma membrane; C:focal adhesion; F:kinesin binding; P:substantia nigra development; C:cortical cytoskeleton; F:Tat protein binding; F:nucleosomal DNA binding; C:NuA4 histone acetyltransferase complex; C:cytoplasmic ribonucleoprotein granule; F:identical protein binding; P:ATP-dependent chromatin remodeling; C:myelin sheath; F:nitric-oxide synthase binding; C:extracellular exosome; P:platelet aggregation; C:obsolete MLL5-L complex; C:blood microparticle; C:dense body                                                                                                                                                                                                                                                                                                                                                                                                                                                                                                                                                                                                                                                                                                                                                                                                                                     |

|                        |                                             |    |                                                                                                                                                                                                                                                                                                                                                                                                                      |                                                                                                                                                                                                                                                                                                                                                                                                                                                                                                                                                                                                                                                                                                                                                                                                                                                                                                                                                                                                                                                                                                       |
|------------------------|---------------------------------------------|----|----------------------------------------------------------------------------------------------------------------------------------------------------------------------------------------------------------------------------------------------------------------------------------------------------------------------------------------------------------------------------------------------------------------------|-------------------------------------------------------------------------------------------------------------------------------------------------------------------------------------------------------------------------------------------------------------------------------------------------------------------------------------------------------------------------------------------------------------------------------------------------------------------------------------------------------------------------------------------------------------------------------------------------------------------------------------------------------------------------------------------------------------------------------------------------------------------------------------------------------------------------------------------------------------------------------------------------------------------------------------------------------------------------------------------------------------------------------------------------------------------------------------------------------|
| GSSPFG00026444001-PA   | beta- partial                               | 24 | C:GO:0000790; F:GO:0000978; F:GO:0000980; P:GO:0001895; F:GO:0005524; C:GO:0005829; C:GO:0005886; C:GO:0005925; F:GO:0019894; P:GO:0021762; C:GO:0030863; F:GO:0030957; F:GO:0031492; C:GO:0035267; C:GO:0036464; F:GO:0042802; P:GO:0043044; C:GO:0043209; F:GO:0050998; C:GO:0070062; P:GO:0070527; C:GO:0070688; C:GO:0072562; C:GO:0097433                                                                       | C:nuclear chromatin; F:RNA polymerase II proximal promoter sequence-specific DNA binding; F:RNA polymerase II distal enhancer sequence-specific DNA binding; P:retina homeostasis; F:ATP binding; C:cytosol; C:plasma membrane; C:focal adhesion; F:kinasin binding; P:substantia nigra development; C:cortical cytoskeleton; F:Tat protein binding; F:nucleosomal DNA binding; C:NuA4 histone acetyltransferase complex; C:cytoplasmic ribonucleoprotein granule; F:identical protein binding; P:ATP-dependent chromatin remodeling; C:myelin sheath; F:nitric-oxide synthase binding; C:extracellular exosome; P:platelet aggregation; C:obsolete MLL5-L complex; C:blood microparticle; C:dense body                                                                                                                                                                                                                                                                                                                                                                                               |
| GSSPFG00017294001-PA   | beta-glucanase                              | 2  | F:GO:0004553; P:GO:0005975                                                                                                                                                                                                                                                                                                                                                                                           | F:hydrolase activity, hydrolyzing O-glycosyl compounds; P:carbohydrate metabolic process                                                                                                                                                                                                                                                                                                                                                                                                                                                                                                                                                                                                                                                                                                                                                                                                                                                                                                                                                                                                              |
| GSSPFG00002042001.2-PA | beta-glucanase                              | 2  | F:GO:0004553; P:GO:0005975                                                                                                                                                                                                                                                                                                                                                                                           | F:hydrolase activity, hydrolyzing O-glycosyl compounds; P:carbohydrate metabolic process                                                                                                                                                                                                                                                                                                                                                                                                                                                                                                                                                                                                                                                                                                                                                                                                                                                                                                                                                                                                              |
| GSSPFG00017301001.1-PA | carboxypeptidase b precursor                | 3  | F:GO:0004181; P:GO:0006508; F:GO:0008270                                                                                                                                                                                                                                                                                                                                                                             | F:metallocarboxypeptidase activity; P:proteolysis; F:zinc ion binding                                                                                                                                                                                                                                                                                                                                                                                                                                                                                                                                                                                                                                                                                                                                                                                                                                                                                                                                                                                                                                 |
| GSSPFG00017300001.1-PA | carboxypeptidase b precursor                | 3  | F:GO:0004181; P:GO:0006508; F:GO:0008270                                                                                                                                                                                                                                                                                                                                                                             | F:metallocarboxypeptidase activity; P:proteolysis; F:zinc ion binding                                                                                                                                                                                                                                                                                                                                                                                                                                                                                                                                                                                                                                                                                                                                                                                                                                                                                                                                                                                                                                 |
| GSSPFG00030472001-PA   | carboxypeptidase b-like                     | 6  | F:GO:0004181; F:GO:0004930; P:GO:0006508; P:GO:0007186; F:GO:0008270; C:GO:0016021                                                                                                                                                                                                                                                                                                                                   | F:metallocarboxypeptidase activity; F:G protein-coupled receptor activity; P:proteolysis; P:G protein-coupled receptor signaling pathway; F:zinc ion binding; C:integral component of membrane                                                                                                                                                                                                                                                                                                                                                                                                                                                                                                                                                                                                                                                                                                                                                                                                                                                                                                        |
| GSSPFG00030477001.4-PA | catalase                                    | 29 | F:GO:0000981; F:GO:0001158; P:GO:0003007; F:GO:0004096; F:GO:0004102; C:GO:0005634; C:GO:0005777; C:GO:0005891; P:GO:0007274; P:GO:0007517; P:GO:0008292; F:GO:0008332; P:GO:0008340; P:GO:0016339; F:GO:0020037; P:GO:0035206; P:GO:0038001; P:GO:0042542; P:GO:0042673; P:GO:0042682; P:GO:0042744; P:GO:0045471; P:GO:0045676; P:GO:0045944; F:GO:0046872; P:GO:0048813; P:GO:0055114; P:GO:0070509; P:GO:0070588 | F:DNA-binding transcription factor activity, RNA polymerase II-specific; F:enhancer sequence-specific DNA binding; P:heart morphogenesis; F:catalase activity; F:choline O-acetyltransferase activity; C:nucleus; C:peroxisome; C:voltage-gated calcium channel complex; P:neuromuscular synaptic transmission; P:muscle organ development; P:acetylcholine biosynthetic process; F:low voltage-gated calcium channel activity; P:determination of adult lifespan; P:calcium-dependent cell-cell adhesion via plasma membrane cell adhesion molecules; F:heme binding; P:regulation of hemocyte proliferation; P:paracrine signaling; P:response to hydrogen peroxide; P:regulation of retinal cone cell fate specification; P:regulation of compound eye cone cell fate specification; P:hydrogen peroxide catabolic process; P:response to ethanol; P:regulation of R7 cell differentiation; P:positive regulation of transcription by RNA polymerase II; F:metal ion binding; P:dendrite morphogenesis; P:oxidation-reduction process; P:calcium ion import; P:calcium ion transmembrane transport |
| GSSPFG00019138001.5-PA | chymotrypsin                                | 2  | F:GO:0004252; P:GO:0006508                                                                                                                                                                                                                                                                                                                                                                                           | F:serine-type endopeptidase activity; P:proteolysis                                                                                                                                                                                                                                                                                                                                                                                                                                                                                                                                                                                                                                                                                                                                                                                                                                                                                                                                                                                                                                                   |
| GSSPFG00019137001.5-PA | chymotrypsin                                | 2  | F:GO:0004252; P:GO:0006508                                                                                                                                                                                                                                                                                                                                                                                           | F:serine-type endopeptidase activity; P:proteolysis                                                                                                                                                                                                                                                                                                                                                                                                                                                                                                                                                                                                                                                                                                                                                                                                                                                                                                                                                                                                                                                   |
| GSSPFG00012295001.5-PA | chymotrypsin                                | 2  | F:GO:0004252; P:GO:0006508                                                                                                                                                                                                                                                                                                                                                                                           | F:serine-type endopeptidase activity; P:proteolysis                                                                                                                                                                                                                                                                                                                                                                                                                                                                                                                                                                                                                                                                                                                                                                                                                                                                                                                                                                                                                                                   |
| GSSPFG00034352001.3-PA | chymotrypsin-like protease                  | 2  | F:GO:0004252; P:GO:0006508                                                                                                                                                                                                                                                                                                                                                                                           | F:serine-type endopeptidase activity; P:proteolysis                                                                                                                                                                                                                                                                                                                                                                                                                                                                                                                                                                                                                                                                                                                                                                                                                                                                                                                                                                                                                                                   |
| GSSPFG00034354001.3-PA | chymotrypsin-like protease                  | 2  | F:GO:0004252; P:GO:0006508                                                                                                                                                                                                                                                                                                                                                                                           | F:serine-type endopeptidase activity; P:proteolysis                                                                                                                                                                                                                                                                                                                                                                                                                                                                                                                                                                                                                                                                                                                                                                                                                                                                                                                                                                                                                                                   |
| GSSPFG00009808001.4-PA | chymotrypsin-like protease                  | 2  | F:GO:0004252; P:GO:0006508                                                                                                                                                                                                                                                                                                                                                                                           | F:serine-type endopeptidase activity; P:proteolysis                                                                                                                                                                                                                                                                                                                                                                                                                                                                                                                                                                                                                                                                                                                                                                                                                                                                                                                                                                                                                                                   |
| GSSPFG00008227001.3-PA | chymotrypsin-like protease                  | 2  | F:GO:0004252; P:GO:0006508                                                                                                                                                                                                                                                                                                                                                                                           | F:serine-type endopeptidase activity; P:proteolysis                                                                                                                                                                                                                                                                                                                                                                                                                                                                                                                                                                                                                                                                                                                                                                                                                                                                                                                                                                                                                                                   |
| GSSPFG00022970001.3-PA | chymotrypsin-like protease                  | 2  | F:GO:0004252; P:GO:0006508                                                                                                                                                                                                                                                                                                                                                                                           | F:serine-type endopeptidase activity; P:proteolysis                                                                                                                                                                                                                                                                                                                                                                                                                                                                                                                                                                                                                                                                                                                                                                                                                                                                                                                                                                                                                                                   |
| GSSPFG00030121001.3-PA | chymotrypsin-like protease                  | 2  | F:GO:0004252; P:GO:0006508                                                                                                                                                                                                                                                                                                                                                                                           | F:serine-type endopeptidase activity; P:proteolysis                                                                                                                                                                                                                                                                                                                                                                                                                                                                                                                                                                                                                                                                                                                                                                                                                                                                                                                                                                                                                                                   |
| GSSPFG00025114001.3-PA | chymotrypsin-like protease c9               | 3  | F:GO:0004252; F:GO:0005515; P:GO:0006508                                                                                                                                                                                                                                                                                                                                                                             | F:serine-type endopeptidase activity; F:protein binding; P:proteolysis                                                                                                                                                                                                                                                                                                                                                                                                                                                                                                                                                                                                                                                                                                                                                                                                                                                                                                                                                                                                                                |
| GSSPFG00032889001.4-PA | chymotrypsin-like proteinase                | 2  | F:GO:0004252; P:GO:0006508                                                                                                                                                                                                                                                                                                                                                                                           | F:serine-type endopeptidase activity; P:proteolysis                                                                                                                                                                                                                                                                                                                                                                                                                                                                                                                                                                                                                                                                                                                                                                                                                                                                                                                                                                                                                                                   |
| GSSPFG00034358001.3-PA | chymotrypsin-like serine protease           | 2  | F:GO:0004252; P:GO:0006508                                                                                                                                                                                                                                                                                                                                                                                           | F:serine-type endopeptidase activity; P:proteolysis                                                                                                                                                                                                                                                                                                                                                                                                                                                                                                                                                                                                                                                                                                                                                                                                                                                                                                                                                                                                                                                   |
| GSSPFG00034359001.3-PA | chymotrypsin-like serine protease           | 2  | F:GO:0004252; P:GO:0006508                                                                                                                                                                                                                                                                                                                                                                                           | F:serine-type endopeptidase activity; P:proteolysis                                                                                                                                                                                                                                                                                                                                                                                                                                                                                                                                                                                                                                                                                                                                                                                                                                                                                                                                                                                                                                                   |
| GSSPFG00002322001.4-PA | chymotrypsin-like serine protease           | 1  | F:GO:0008236                                                                                                                                                                                                                                                                                                                                                                                                         | F:serine-type peptidase activity                                                                                                                                                                                                                                                                                                                                                                                                                                                                                                                                                                                                                                                                                                                                                                                                                                                                                                                                                                                                                                                                      |
| GSSPFG00005604001.2-PA | chymotrypsin-like serine protease 14        | 3  | F:GO:0008236; P:GO:0044238; P:GO:0071704                                                                                                                                                                                                                                                                                                                                                                             | F:serine-type peptidase activity; P:primary metabolic process; P:organic substance metabolic process                                                                                                                                                                                                                                                                                                                                                                                                                                                                                                                                                                                                                                                                                                                                                                                                                                                                                                                                                                                                  |
| GSSPFG00013449001.3-PA | chymotrypsin-like serine protease precursor | 2  | F:GO:0004252; P:GO:0006508                                                                                                                                                                                                                                                                                                                                                                                           | F:serine-type endopeptidase activity; P:proteolysis                                                                                                                                                                                                                                                                                                                                                                                                                                                                                                                                                                                                                                                                                                                                                                                                                                                                                                                                                                                                                                                   |
| GSSPFG00034231001-PA   | cytosolic non-specific dipeptidase          | 5  | F:GO:0004180; P:GO:0006508; F:GO:0008237; F:GO:0016805; F:GO:0034701                                                                                                                                                                                                                                                                                                                                                 | F:carboxypeptidase activity; P:proteolysis; F:metallopeptidase activity; F:dipeptidase activity; F:tripeptidase activity                                                                                                                                                                                                                                                                                                                                                                                                                                                                                                                                                                                                                                                                                                                                                                                                                                                                                                                                                                              |
| GSSPFG00014405001-PA   | dipeptidyl peptidase 4                      | 3  | P:GO:0006508; F:GO:0008236; C:GO:0016020                                                                                                                                                                                                                                                                                                                                                                             | P:proteolysis; F:serine-type peptidase activity; C:membrane                                                                                                                                                                                                                                                                                                                                                                                                                                                                                                                                                                                                                                                                                                                                                                                                                                                                                                                                                                                                                                           |
| GSSPFG00002766001-PA   | elongation factor 1 alpha                   | 9  | F:GO:0003746; F:GO:0003924; F:GO:0005525; C:GO:0005811; C:GO:0005829; C:GO:0005853; C:GO:0005875; P:GO:0006414; P:GO:0008340                                                                                                                                                                                                                                                                                         | F:translation elongation factor activity; F:GTPase activity; F:GTP binding; C:lipid droplet; C:cytosol; C:eukaryotic translation elongation factor 1 complex; C:microtubule associated complex; P:translational elongation; P:determination of adult lifespan                                                                                                                                                                                                                                                                                                                                                                                                                                                                                                                                                                                                                                                                                                                                                                                                                                         |
| GSSPFG00027742001-PA   | elongation factor 1 alpha                   | 9  | F:GO:0003746; F:GO:0003924; F:GO:0005525; C:GO:0005811; C:GO:0005829; C:GO:0005853; C:GO:0005875; P:GO:0006414; P:GO:0008340                                                                                                                                                                                                                                                                                         | F:translation elongation factor activity; F:GTPase activity; F:GTP binding; C:lipid droplet; C:cytosol; C:eukaryotic translation elongation factor 1 complex; C:microtubule associated complex; P:translational elongation; P:determination of adult lifespan                                                                                                                                                                                                                                                                                                                                                                                                                                                                                                                                                                                                                                                                                                                                                                                                                                         |
| GSSPFG00029239001-PA   | ester hydrolase c11orf54 homolog            | 1  | C:GO:0005634                                                                                                                                                                                                                                                                                                                                                                                                         | C:nucleus                                                                                                                                                                                                                                                                                                                                                                                                                                                                                                                                                                                                                                                                                                                                                                                                                                                                                                                                                                                                                                                                                             |
| GSSPFG00003392001-PA   | farnesoic acid o-methyl transferase         | 2  | F:GO:0008168; P:GO:0032259                                                                                                                                                                                                                                                                                                                                                                                           | F:methyltransferase activity; P:methylation                                                                                                                                                                                                                                                                                                                                                                                                                                                                                                                                                                                                                                                                                                                                                                                                                                                                                                                                                                                                                                                           |
| GSSPFG00011246001-PA   | farnesoic acid o-methyl transferase         | 2  | F:GO:0008168; P:GO:0032259                                                                                                                                                                                                                                                                                                                                                                                           | F:methyltransferase activity; P:methylation                                                                                                                                                                                                                                                                                                                                                                                                                                                                                                                                                                                                                                                                                                                                                                                                                                                                                                                                                                                                                                                           |
| GSSPFG00008415001-PA   | fructose -bisphosphate aldolase             | 2  | F:GO:0004332; P:GO:0006096                                                                                                                                                                                                                                                                                                                                                                                           | F:fructose-bisphosphate aldolase activity; P:glycolytic process                                                                                                                                                                                                                                                                                                                                                                                                                                                                                                                                                                                                                                                                                                                                                                                                                                                                                                                                                                                                                                       |
| GSSPFG00032332001.1-PA | fructose-bisphosphate aldolase isoform x1   | 2  | F:GO:0004332; P:GO:0006096                                                                                                                                                                                                                                                                                                                                                                                           | F:fructose-bisphosphate aldolase activity; P:glycolytic process                                                                                                                                                                                                                                                                                                                                                                                                                                                                                                                                                                                                                                                                                                                                                                                                                                                                                                                                                                                                                                       |
| GSSPFG00021650001-PA   | glucose dehydrogenase                       | 1  | F:GO:0016491                                                                                                                                                                                                                                                                                                                                                                                                         | F:oxidoreductase activity                                                                                                                                                                                                                                                                                                                                                                                                                                                                                                                                                                                                                                                                                                                                                                                                                                                                                                                                                                                                                                                                             |

|                        |                                             |    |                                                                                                                                            |                                                                                                                                                                                                                                                                                     |
|------------------------|---------------------------------------------|----|--------------------------------------------------------------------------------------------------------------------------------------------|-------------------------------------------------------------------------------------------------------------------------------------------------------------------------------------------------------------------------------------------------------------------------------------|
| GSSPFG00026492001.1-PA | glucosylceramidase-like                     | 3  | P:GO:0006665; F:GO:0016787; P:GO:0050794                                                                                                   | P:sphingolipid metabolic process; F:hydrolase activity; P:regulation of cellular process                                                                                                                                                                                            |
| GSSPFG00029293001.4-PA | glutathione s-transferase                   | 2  | P:GO:0008152; F:GO:0016740                                                                                                                 | P:metabolic process; F:transferase activity                                                                                                                                                                                                                                         |
| GSSPFG00031187001.6-PA | glutathione s-transferase                   | 2  | F:GO:0004364; P:GO:0008152                                                                                                                 | F:glutathione transferase activity; P:metabolic process                                                                                                                                                                                                                             |
| GSSPFG00031188001.6-PA | glutathione s-transferase                   | 2  | F:GO:0004364; P:GO:0008152                                                                                                                 | F:glutathione transferase activity; P:metabolic process                                                                                                                                                                                                                             |
| GSSPFG00028139001-PA   | glyceraldehyde-3-phosphate dehydrogenase    | 6  | F:GO:0004365; P:GO:0006006; P:GO:0006096; F:GO:0050661; F:GO:0051287; P:GO:0055114                                                         | F:glyceraldehyde-3-phosphate dehydrogenase (NAD+) (phosphorylating) activity; P:glucose metabolic process; P:glycolytic process; F:NADP binding; F:NAD binding; P:oxidation-reduction process                                                                                       |
| GSSPFG00007681001-PA   | glyceraldehyde-3-phosphate dehydrogenase    | 6  | F:GO:0004365; P:GO:0006006; P:GO:0006096; F:GO:0050661; F:GO:0051287; P:GO:0055114                                                         | F:glyceraldehyde-3-phosphate dehydrogenase (NAD+) (phosphorylating) activity; P:glucose metabolic process; P:glycolytic process; F:NADP binding; F:NAD binding; P:oxidation-reduction process                                                                                       |
| GSSPFG00004198001.1-PA | hatching enzyme-like protein                | 3  | F:GO:0008237; P:GO:0022008; F:GO:0046872                                                                                                   | F:metallopeptidase activity; P:neurogenesis; F:metal ion binding                                                                                                                                                                                                                    |
| GSSPFG00019658001.3-PA | heat shock protein 70                       | 2  | F:GO:0005524; C:GO:0005634                                                                                                                 | F:ATP binding; C:nucleus                                                                                                                                                                                                                                                            |
| GSSPFG0000687001.3-PA  | hemocytin                                   | 1  | F:GO:0005488                                                                                                                               | F:binding                                                                                                                                                                                                                                                                           |
| GSSPFG00033211001-PA   | hydroxybutyrate dehydrogenase               | 2  | F:GO:0016491; P:GO:0055114                                                                                                                 | F:oxido-reductase activity; P:oxidation-reduction process                                                                                                                                                                                                                           |
| GSSPFG00031044001-PA   | imaginal disc growth factor                 | 4  | F:GO:0004568; C:GO:0005576; P:GO:0005975; P:GO:0006032                                                                                     | F:chitinase activity; C:extracellular region; P:carbohydrate metabolic process; P:chitin catabolic process                                                                                                                                                                          |
| GSSPFG00031848001-PA   | insect intestinal mucin 4                   | 3  | C:GO:0005576; P:GO:0006030; F:GO:0008061                                                                                                   | C:extracellular region; P:chitin metabolic process; F:chitin binding                                                                                                                                                                                                                |
| GSSPFG00012306001-PA   | intestinal mucin                            | 3  | C:GO:0005576; P:GO:0006030; F:GO:0008061                                                                                                   | C:extracellular region; P:chitin metabolic process; F:chitin binding                                                                                                                                                                                                                |
| GSSPFG00034251001-PA   | intestinal mucin                            | 3  | C:GO:0005576; P:GO:0006030; F:GO:0008061                                                                                                   | C:extracellular region; P:chitin metabolic process; F:chitin binding                                                                                                                                                                                                                |
| GSSPFG00000143001-PA   | intestinal mucin                            | 3  | C:GO:0005576; P:GO:0006030; F:GO:0008061                                                                                                   | C:extracellular region; P:chitin metabolic process; F:chitin binding                                                                                                                                                                                                                |
| GSSPFG00032729001.1-PA | lipase                                      | 3  | F:GO:0004806; C:GO:0005576; P:GO:0008152                                                                                                   | F:triglyceride lipase activity; C:extracellular region; P:metabolic process                                                                                                                                                                                                         |
| GSSPFG00032730001-PA   | lipase                                      | 3  | C:GO:0005576; P:GO:0008152; F:GO:0052689                                                                                                   | C:extracellular region; P:metabolic process; F:carboxylic ester hydrolase activity                                                                                                                                                                                                  |
| GSSPFG00019149001.1-PA | lipase 1-like                               | 2  | P:GO:0016042; F:GO:0016788                                                                                                                 | P:lipid catabolic process; F:hydrolase activity, acting on ester bonds                                                                                                                                                                                                              |
| GSSPFG00022875001-PA   | lipase 3-like                               | 2  | P:GO:0016042; F:GO:0016788                                                                                                                 | P:lipid catabolic process; F:hydrolase activity, acting on ester bonds                                                                                                                                                                                                              |
| GSSPFG00030786001-PA   | lipoprotein lipase-like                     | 3  | C:GO:0005576; P:GO:0008152; F:GO:0052689                                                                                                   | C:extracellular region; P:metabolic process; F:carboxylic ester hydrolase activity                                                                                                                                                                                                  |
| GSSPFG00030535001-PA   | methionine-rich storage protein             | 2  | C:GO:0005615; F:GO:0045735                                                                                                                 | C:extracellular space; F:nutrient reservoir activity                                                                                                                                                                                                                                |
| GSSPFG00021328001-PA   | methionine-rich storage protein             | 2  | C:GO:0005615; F:GO:0045735                                                                                                                 | C:extracellular space; F:nutrient reservoir activity                                                                                                                                                                                                                                |
| GSSPFG00001760001.1-PA | mitochondrial aldehyde dehydrogenase        | 4  | F:GO:0004029; C:GO:0005759; P:GO:0006090; P:GO:0055114                                                                                     | F:aldehyde dehydrogenase (NAD) activity; C:mitochondrial matrix; P:pyruvate metabolic process; P:oxidation-reduction process                                                                                                                                                        |
| GSSPFG00028320001-PA   | moderately methionine rich storage protein  | 1  | F:GO:0045735                                                                                                                               | F:nutrient reservoir activity                                                                                                                                                                                                                                                       |
| GSSPFG00028322001-PA   | moderately methionine rich storage protein  | 1  | F:GO:0045735                                                                                                                               | F:nutrient reservoir activity                                                                                                                                                                                                                                                       |
| GSSPFG00007022001-PA   | muscle                                      | 10 | F:GO:0004452; F:GO:0005200; F:GO:0005524; C:GO:0005737; C:GO:0005884; P:GO:0006909; P:GO:0008299; P:GO:0014866; F:GO:0016787; P:GO:0071689 | F:isopentenyl-diphosphate delta-isomerase activity; F:structural constituent of cytoskeleton; F:ATP binding; C:cytoplasm; C:actin filament; P:phagocytosis; P:isoprenoid biosynthetic process; P:skeletal myofibril assembly; F:hydrolase activity; P:muscle thin filament assembly |
| GSSPFG00002079001-PA   | muscle                                      | 6  | F:GO:0004452; F:GO:0005524; C:GO:0005737; C:GO:0005856; P:GO:0008299; F:GO:0016787                                                         | F:isopentenyl-diphosphate delta-isomerase activity; F:ATP binding; C:cytoplasm; C:cytoskeleton; P:isoprenoid biosynthetic process; F:hydrolase activity                                                                                                                             |
| GSSPFG00030827001-PA   | myosin-ib isoform x2                        | 1  | F:GO:0000166                                                                                                                               | F:nucleotide binding                                                                                                                                                                                                                                                                |
| GSSPFG00005110001-PA   | neutral lipase                              | 3  | F:GO:0004806; C:GO:0005576; P:GO:0008152                                                                                                   | F:triglyceride lipase activity; C:extracellular region; P:metabolic process                                                                                                                                                                                                         |
| GSSPFG00005485001.1-PA | neutral lipase                              | 3  | F:GO:0004806; C:GO:0005576; P:GO:0008152                                                                                                   | F:triglyceride lipase activity; C:extracellular region; P:metabolic process                                                                                                                                                                                                         |
| GSSPFG00006266001-PA   | pancreatic triacylglycerol lipase-like      | 3  | C:GO:0005576; P:GO:0008152; F:GO:0052689                                                                                                   | C:extracellular region; P:metabolic process; F:carboxylic ester hydrolase activity                                                                                                                                                                                                  |
| GSSPFG00024193001-PA   | pancreatic triacylglycerol lipase-like      | 3  | C:GO:0005576; P:GO:0008152; F:GO:0052689                                                                                                   | C:extracellular region; P:metabolic process; F:carboxylic ester hydrolase activity                                                                                                                                                                                                  |
| GSSPFG00009950001-PA   | pancreatic triacylglycerol lipase-like      | 3  | C:GO:0005576; P:GO:0008152; F:GO:0052689                                                                                                   | C:extracellular region; P:metabolic process; F:carboxylic ester hydrolase activity                                                                                                                                                                                                  |
| GSSPFG00005109001-PA   | pancreatic triacylglycerol lipase-like      | 3  | C:GO:0005576; P:GO:0008152; F:GO:0052689                                                                                                   | C:extracellular region; P:metabolic process; F:carboxylic ester hydrolase activity                                                                                                                                                                                                  |
| GSSPFG00003910001-PA   | peptidyl-prolyl cis-trans isomerase 5       | 3  | P:GO:0000413; F:GO:0003755; P:GO:0006457                                                                                                   | P:protein peptidyl-prolyl isomerization; F:peptidyl-prolyl cis-trans isomerase activity; P:protein folding                                                                                                                                                                          |
| GSSPFG00031847001-PA   | peritrophic matrix insect intestinal mucin  | 3  | C:GO:0005576; P:GO:0006030; F:GO:0008061                                                                                                   | C:extracellular region; P:chitin metabolic process; F:chitin binding                                                                                                                                                                                                                |
| GSSPFG00013728001-PA   | peritrophic membrane chitin binding protein | 3  | P:GO:0005975; F:GO:0016810; F:GO:0051060                                                                                                   | P:carbohydrate metabolic process; F:hydrolase activity, acting on carbon-nitrogen (but not peptide) bonds; F:pullulanase activity                                                                                                                                                   |
| GSSPFG00016558001.1-PA | peritrophic membrane chitin binding protein | 3  | P:GO:0005975; F:GO:0016810; F:GO:0051060                                                                                                   | P:carbohydrate metabolic process; F:hydrolase activity, acting on carbon-nitrogen (but not peptide) bonds; F:pullulanase activity                                                                                                                                                   |
| GSSPFG00015718001.1-PA | polycomb protein suz12-b isoform x1         | 4  | F:GO:0003756; C:GO:0005783; P:GO:0006457; P:GO:0045454                                                                                     | F:protein disulfide isomerase activity; C:endoplasmic reticulum; P:protein folding; P:cell redox homeostasis                                                                                                                                                                        |

|                        |                                          |   |                                                                                                                |                                                                                                                                                                                                                                                |
|------------------------|------------------------------------------|---|----------------------------------------------------------------------------------------------------------------|------------------------------------------------------------------------------------------------------------------------------------------------------------------------------------------------------------------------------------------------|
| GSSPFG00021013001.3-PA | prophenoloxidase subunit 1               | 7 | F:GO:0004503; F:GO:0005507; C:GO:0005576; P:GO:0006583; F:GO:0031404; P:GO:0035008; P:GO:0055114               | F:monophenol monooxygenase activity; F:copper ion binding; C:extracellular region; P:melanin biosynthetic process from tyrosine; F:chloride ion binding; P:positive regulation of melanization defense response; P:oxidation-reduction process |
| GSSPFG00012369001-PA   | prophenoloxidase subunit 1               | 7 | F:GO:0004503; F:GO:0005507; C:GO:0005576; P:GO:0006583; F:GO:0031404; P:GO:0035008; P:GO:0055114               | F:monophenol monooxygenase activity; F:copper ion binding; C:extracellular region; P:melanin biosynthetic process from tyrosine; F:chloride ion binding; P:positive regulation of melanization defense response; P:oxidation-reduction process |
| GSSPFG00013976001.3-PA | prophenoloxidase subunit 2               | 7 | F:GO:0004503; F:GO:0005507; C:GO:0005576; P:GO:0006583; F:GO:0031404; P:GO:0035008; P:GO:0055114               | F:monophenol monooxygenase activity; F:copper ion binding; C:extracellular region; P:melanin biosynthetic process from tyrosine; F:chloride ion binding; P:positive regulation of melanization defense response; P:oxidation-reduction process |
| GSSPFG00034655001.1-PA | protein disulfide-isomerase              | 4 | F:GO:0003756; C:GO:0005783; P:GO:0006457; P:GO:0045454                                                         | F:protein disulfide isomerase activity; C:endoplasmic reticulum; P:protein folding; P:cell redox homeostasis                                                                                                                                   |
| GSSPFG00003602001.1-PA | protein disulfide-isomerase              | 4 | F:GO:0003756; C:GO:0005783; P:GO:0006457; P:GO:0045454                                                         | F:protein disulfide isomerase activity; C:endoplasmic reticulum; P:protein folding; P:cell redox homeostasis                                                                                                                                   |
| GSSPFG00025002001-PA   | pyruvate kinase                          | 5 | F:GO:0000287; F:GO:0004743; P:GO:0006096; F:GO:0016301; F:GO:0030955                                           | F:magnesium ion binding; F:pyruvate kinase activity; P:glycolytic process; F:kinase activity; F:potassium ion binding                                                                                                                          |
| GSSPFG00021735001.1-PA | pyruvate kinase-like isoform x1          | 5 | F:GO:0000287; F:GO:0004743; P:GO:0006096; F:GO:0016301; F:GO:0030955                                           | F:magnesium ion binding; F:pyruvate kinase activity; P:glycolytic process; F:kinase activity; F:potassium ion binding                                                                                                                          |
| GSSPFG00009143001-PA   | retinal dehydrogenase 1                  | 4 | F:GO:0001758; F:GO:0004028; F:GO:0018479; P:GO:0055114                                                         | F:retinal dehydrogenase activity; F:3-chloroallyl aldehyde dehydrogenase activity; F:benzaldehyde dehydrogenase (NAD+) activity; P:oxidation-reduction process                                                                                 |
| GSSPFG00035967001.2-PA | serine protease                          | 2 | F:GO:0004252; P:GO:0006508                                                                                     | F:serine-type endopeptidase activity; P:proteolysis                                                                                                                                                                                            |
| GSSPFG00002248001.3-PA | serine protease 11                       | 2 | F:GO:0004252; P:GO:0006508                                                                                     | F:serine-type endopeptidase activity; P:proteolysis                                                                                                                                                                                            |
| GSSPFG00020781001.3-PA | serine protease 11                       | 2 | F:GO:0004252; P:GO:0006508                                                                                     | F:serine-type endopeptidase activity; P:proteolysis                                                                                                                                                                                            |
| GSSPFG00000365001.3-PA | serine protease 2                        | 2 | F:GO:0004252; P:GO:0006508                                                                                     | F:serine-type endopeptidase activity; P:proteolysis                                                                                                                                                                                            |
| GSSPFG00033017001.3-PA | serine protease 33                       | 2 | F:GO:0004252; P:GO:0006508                                                                                     | F:serine-type endopeptidase activity; P:proteolysis                                                                                                                                                                                            |
| GSSPFG00028610001.3-PA | serine protease 33                       | 1 | F:GO:0008236                                                                                                   | F:serine-type peptidase activity                                                                                                                                                                                                               |
| GSSPFG00033041001.2-PA | serine protease 38                       | 1 | F:GO:0008233                                                                                                   | F:peptidase activity                                                                                                                                                                                                                           |
| GSSPFG00025116001.3-PA | serine protease 40                       | 2 | F:GO:0005515; F:GO:0008236                                                                                     | F:protein binding; F:serine-type peptidase activity                                                                                                                                                                                            |
| GSSPFG00014594001.3-PA | serine protease 40                       | 3 | F:GO:0004252; F:GO:0005515; P:GO:0006508                                                                       | F:serine-type endopeptidase activity; F:protein binding; P:proteolysis                                                                                                                                                                         |
| GSSPFG00028801001-PA   | serine protease snake-like               | 1 | F:GO:0016787                                                                                                   | F:hydrolase activity                                                                                                                                                                                                                           |
| GSSPFG00009353001-PA   | serine protease snake-like               | 1 | F:GO:0008233                                                                                                   | F:peptidase activity                                                                                                                                                                                                                           |
| GSSPFG00012894001-PA   | serpin 1                                 | 4 | C:GO:0005615; F:GO:0008233; P:GO:0010466; F:GO:0030414                                                         | C:extracellular space; F:peptidase activity; P:negative regulation of peptidase activity; F:peptidase inhibitor activity                                                                                                                       |
| GSSPFG00027555001-PA   | thymus-specific serine protease          | 3 | F:GO:0004180; P:GO:0006508; F:GO:0008236                                                                       | F:carboxypeptidase activity; P:proteolysis; F:serine-type peptidase activity                                                                                                                                                                   |
| GSSPFG00018186001.2-PA | triosephosphate isomerase                | 8 | F:GO:0003735; F:GO:0004807; C:GO:0005840; P:GO:0006094; P:GO:0006096; P:GO:0006098; P:GO:0006412; F:GO:0019843 | F:structural constituent of ribosome; F:triose-phosphate isomerase activity; C:ribosome; P:gluconeogenesis; P:glycolytic process; P:pentose-phosphate shunt; P:translation; F:rRNA binding                                                     |
| GSSPFG00018186001.2-PB | triosephosphate isomerase                | 8 | F:GO:0003735; F:GO:0004807; C:GO:0005840; P:GO:0006094; P:GO:0006096; P:GO:0006098; P:GO:0006412; F:GO:0019843 | F:structural constituent of ribosome; F:triose-phosphate isomerase activity; C:ribosome; P:gluconeogenesis; P:glycolytic process; P:pentose-phosphate shunt; P:translation; F:rRNA binding                                                     |
| GSSPFG00001201001.2-PA | trypsin ia2                              | 1 | F:GO:0008236                                                                                                   | F:serine-type peptidase activity                                                                                                                                                                                                               |
| GSSPFG00035969001.2-PA | trypsin ia2                              | 2 | F:GO:0004252; P:GO:0006508                                                                                     | F:serine-type endopeptidase activity; P:proteolysis                                                                                                                                                                                            |
| GSSPFG00034101001.3-PA | trypsin precursor 9                      | 2 | F:GO:0004252; P:GO:0006508                                                                                     | F:serine-type endopeptidase activity; P:proteolysis                                                                                                                                                                                            |
| GSSPFG00005080001.4-PA | trypsin precursor 9                      | 2 | F:GO:0004252; P:GO:0006508                                                                                     | F:serine-type endopeptidase activity; P:proteolysis                                                                                                                                                                                            |
| GSSPFG00019625001.2-PA | trypsin-like protease                    | 2 | F:GO:0004252; P:GO:0006508                                                                                     | F:serine-type endopeptidase activity; P:proteolysis                                                                                                                                                                                            |
| GSSPFG00012657001.3-PA | trypsin-like protease                    | 2 | F:GO:0004252; P:GO:0006508                                                                                     | F:serine-type endopeptidase activity; P:proteolysis                                                                                                                                                                                            |
| GSSPFG00007297001.3-PA | trypsin-like protease                    | 2 | F:GO:0004252; P:GO:0006508                                                                                     | F:serine-type endopeptidase activity; P:proteolysis                                                                                                                                                                                            |
| GSSPFG00032515001.3-PA | trypsin-like protease                    | 1 | F:GO:0016787                                                                                                   | F:hydrolase activity                                                                                                                                                                                                                           |
| GSSPFG00021205001.4-PA | trypsin-like protease                    | 2 | F:GO:0004252; P:GO:0006508                                                                                     | F:serine-type endopeptidase activity; P:proteolysis                                                                                                                                                                                            |
| GSSPFG00013283001.6-PB | trypsin-like protease                    | 2 | F:GO:0004252; P:GO:0006508                                                                                     | F:serine-type endopeptidase activity; P:proteolysis                                                                                                                                                                                            |
| GSSPFG00013282001.6-PA | trypsin-like protease                    | 2 | F:GO:0004252; P:GO:0006508                                                                                     | F:serine-type endopeptidase activity; P:proteolysis                                                                                                                                                                                            |
| GSSPFG00012077001.4-PA | trypsin-like serine partial              | 2 | F:GO:0004252; P:GO:0006508                                                                                     | F:serine-type endopeptidase activity; P:proteolysis                                                                                                                                                                                            |
| GSSPFG00028489001.5-PB | trypsin-like serine proteinase t26       | 3 | F:GO:0004252; F:GO:0005515; P:GO:0006508                                                                       | F:serine-type endopeptidase activity; F:protein binding; P:proteolysis                                                                                                                                                                         |
| GSSPFG00028708001.1-PA | uncharacterized protein loc100878113     | 3 | P:GO:0006413; C:GO:0032991; C:GO:0044444                                                                       | P:translational initiation; C:protein-containing complex; C:cytoplasmic part                                                                                                                                                                   |
| GSSPFG00027141001-PA   | v-type proton atpase catalytic subunit a | 5 | F:GO:0005524; P:GO:0015991; C:GO:0033180; P:GO:0046034; F:GO:0046961                                           | F:ATP binding; P:ATP hydrolysis coupled proton transport; C:proton-transporting V-type ATPase, V1 domain; P:ATP metabolic process; F:proton-transporting ATPase activity, rotational mechanism                                                 |
| GSSPFG00034314001-PA   | xaa-pro aminopeptidase 1                 | 2 | P:GO:0008152; F:GO:0016787                                                                                     | P:metabolic process; F:hydrolase activity                                                                                                                                                                                                      |
| GSSPFG00018804001.1-PA | zinc carboxypeptidase-like               | 1 | F:GO:0004180                                                                                                   | F:carboxypeptidase activity                                                                                                                                                                                                                    |
| GSSPFG00017650001-PA   | zinc carboxypeptidase-like               | 2 | F:GO:0004180; F:GO:0046872                                                                                     | F:carboxypeptidase activity; F:metal ion binding                                                                                                                                                                                               |
