# Supplementary material for: Interaction of a Densovirus with Glycans of the Peritrophic Matrix Mediates Oral Infection of the Lepidopteran Pest Spodoptera frugiperda
Source: MDPI journal article supplement (doi:10.3390/v11090870), 2019-09-17
Supplement: s1 [file s1]

A

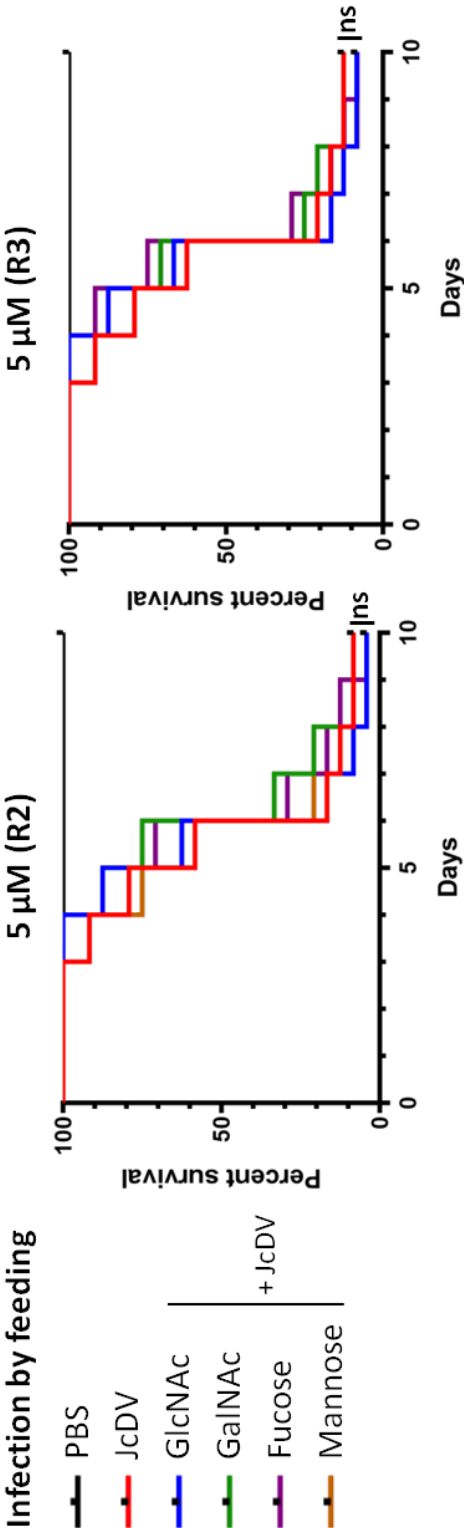

B

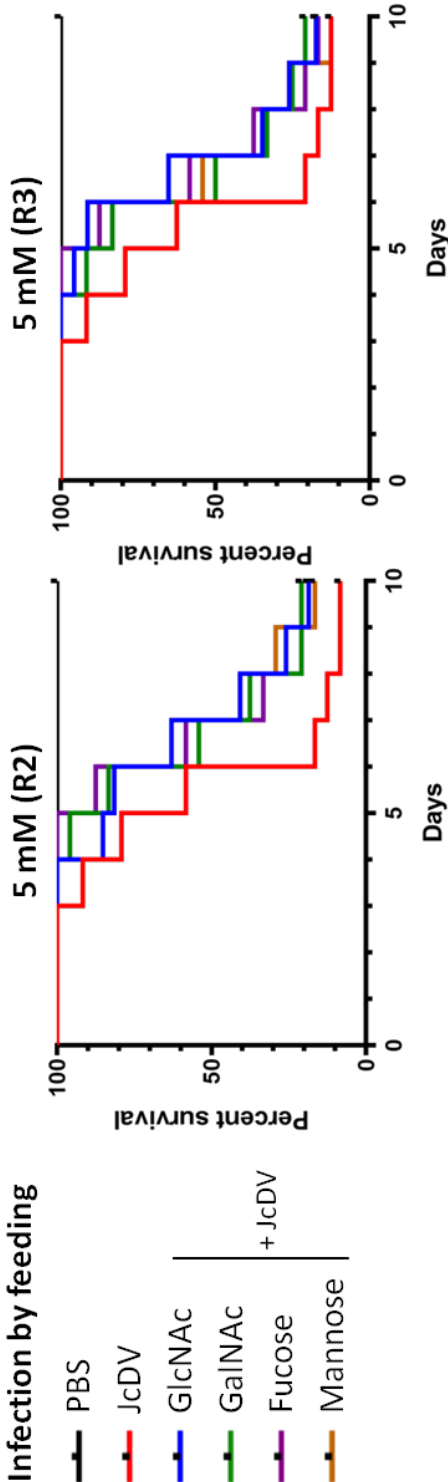

| Pairwise comparison |                        | Log-rank (Mantel-Cox) | Gehan-Breslow-Wilcoxon |
|---------------------|------------------------|-----------------------|------------------------|
| R2                  | JcDV + GlcNAc vs JcDV  | $P$ value = 0.0143 *  | $P$ value = 0.006 **   |
|                     | JcDV + GalNAc vs JcDV  | $P$ value = 0.0174 *  | $P$ value = 0.007 **   |
|                     | JcDV + Fucose vs JcDV  | $P$ value = 0.009 **  | $P$ value = 0.0023 **  |
|                     | JcDV + Mannose vs JcDV | $P$ value = 0.0157 *  | $P$ value = 0.0038 **  |
| R3                  | JcDV + GlcNAc vs JcDV  | $P$ value = 0.0371 *  | $P$ value = 0.0047 **  |
|                     | JcDV + GalNAc vs JcDV  | $P$ value = 0.0954 ns | $P$ value = 0.0371 *   |
|                     | JcDV + Fucose vs JcDV  | $P$ value = 0.0588 ns | $P$ value = 0.0099 **  |
|                     | JcDV + Mannose vs JcDV | $P$ value = 0.1179 ns | $P$ value = 0.0211 *   |
