# Supplementary material for: Interaction of a Densovirus with Glycans of the Peritrophic Matrix Mediates Oral Infection of the Lepidopteran Pest Spodoptera frugiperda
Source: MDPI journal article supplement (doi:10.3390/v11090870), 2019-09-17
Supplement: s1 [file s1]

| Name                   | Description                                                | #GO | GO IDs                                                                                                                                                                                                                                                                                                                                                                                                                                                                                                                               | GO Names                                                                                                                                                                                                                                                                                                                                                                                                                                                                                                                                                                                                                                                                                                                                                                                                                                                                                                                                                                                                                                                                                                                                                                                                                                                                          |
|------------------------|------------------------------------------------------------|-----|--------------------------------------------------------------------------------------------------------------------------------------------------------------------------------------------------------------------------------------------------------------------------------------------------------------------------------------------------------------------------------------------------------------------------------------------------------------------------------------------------------------------------------------|-----------------------------------------------------------------------------------------------------------------------------------------------------------------------------------------------------------------------------------------------------------------------------------------------------------------------------------------------------------------------------------------------------------------------------------------------------------------------------------------------------------------------------------------------------------------------------------------------------------------------------------------------------------------------------------------------------------------------------------------------------------------------------------------------------------------------------------------------------------------------------------------------------------------------------------------------------------------------------------------------------------------------------------------------------------------------------------------------------------------------------------------------------------------------------------------------------------------------------------------------------------------------------------|
| GSSPFG00022879001-PA   | 14-3-3 protein zeta isoform x1                             | 2   | C:GO:0005737; F:GO:0019904                                                                                                                                                                                                                                                                                                                                                                                                                                                                                                           | C:cytoplasm; F:protein domain specific binding                                                                                                                                                                                                                                                                                                                                                                                                                                                                                                                                                                                                                                                                                                                                                                                                                                                                                                                                                                                                                                                                                                                                                                                                                                    |
| GSSPFG00020046001-PA   | arginine kinase                                            | 3   | F:GO:0004054; F:GO:0005524; P:GO:0016310                                                                                                                                                                                                                                                                                                                                                                                                                                                                                             | F:arginine kinase activity; F:ATP binding; P:phosphorylation                                                                                                                                                                                                                                                                                                                                                                                                                                                                                                                                                                                                                                                                                                                                                                                                                                                                                                                                                                                                                                                                                                                                                                                                                      |
| GSSPFG00030477001.4-PA | catalase                                                   | 29  | F:GO:0000981; F:GO:0001158; P:GO:0003007; F:GO:0004096; F:GO:0004102; C:GO:0005634; C:GO:0005777; C:GO:0005891; P:GO:0007274; P:GO:0007517; P:GO:0008292; F:GO:0008332; P:GO:0008340; P:GO:0016339; F:GO:0020037; P:GO:0035206; P:GO:0038001; P:GO:0042542; P:GO:0042673; P:GO:0042682; P:GO:0042744; P:GO:0045471; P:GO:0045676; P:GO:0045944; F:GO:0046872; P:GO:0048813; P:GO:0055114; P:GO:0070509; P:GO:0070588                                                                                                                 | F:DNA-binding transcription factor activity, RNA polymerase II-specific; F:enhancer sequence-specific DNA binding; P:heart morphogenesis; F:catalase activity; F:choline O-acetyltransferase activity; C:nucleus; C:peroxisome; C:voltage-gated calcium channel complex; P:neuromuscular synaptic transmission; P:muscle organ development; P:acetylcholine biosynthetic process; F:low voltage-gated calcium channel activity; P:determination of adult lifespan; P:calcium-dependent cell-cell adhesion via plasma membrane cell adhesion molecules; F:heme binding; P:regulation of hemocyte proliferation; P:paracrine signaling; P:response to hydrogen peroxide; P:regulation of retinal cone cell fate specification; P:regulation of compound eye cone cell fate specification; P:hydrogen peroxide catabolic process; P:response to ethanol; P:regulation of R7 cell differentiation; P:positive regulation of transcription by RNA polymerase II; F:metal ion binding; P:dendrite morphogenesis; P:oxidation-reduction process; P:calcium ion import; P:calcium ion transmembrane transport                                                                                                                                                                             |
| GSSPFG00016528001-PA   | cd63 antigen-like isoform x1                               | 1   | C:GO:0016021                                                                                                                                                                                                                                                                                                                                                                                                                                                                                                                         | C:integral component of membrane                                                                                                                                                                                                                                                                                                                                                                                                                                                                                                                                                                                                                                                                                                                                                                                                                                                                                                                                                                                                                                                                                                                                                                                                                                                  |
| GSSPFG00034359001.3-PA | chymotrypsin-like serine protease                          | 2   | F:GO:0004252; P:GO:0006508                                                                                                                                                                                                                                                                                                                                                                                                                                                                                                           | F:serine-type endopeptidase activity; P:proteolysis                                                                                                                                                                                                                                                                                                                                                                                                                                                                                                                                                                                                                                                                                                                                                                                                                                                                                                                                                                                                                                                                                                                                                                                                                               |
| GSSPFG00022639001.1-PA | cklf-like marvel transmembrane domain-containing protein 4 | 1   | C:GO:0016020                                                                                                                                                                                                                                                                                                                                                                                                                                                                                                                         | C:membrane                                                                                                                                                                                                                                                                                                                                                                                                                                                                                                                                                                                                                                                                                                                                                                                                                                                                                                                                                                                                                                                                                                                                                                                                                                                                        |
| GSSPFG00018884001.2-PA | cytochrome p450                                            | 5   | F:GO:0004497; F:GO:0005506; F:GO:0016705; P:GO:0020037; P:GO:0055114                                                                                                                                                                                                                                                                                                                                                                                                                                                                 | F:monooxygenase activity; F:iron ion binding; F:oxidoreductase activity, acting on paired donors, with incorporation or reduction of molecular oxygen; F:heme binding; P:oxidation-reduction process                                                                                                                                                                                                                                                                                                                                                                                                                                                                                                                                                                                                                                                                                                                                                                                                                                                                                                                                                                                                                                                                              |
| GSSPFG00016699001-PA   | cytosolic 10-formyltetrahydrofolate dehydrogenase          | 10  | C:GO:0005737; P:GO:0006730; F:GO:0008168; P:GO:0009058; P:GO:0009258; F:GO:0016155; F:GO:0016620; P:GO:0016742; P:GO:0032259; P:GO:0055114                                                                                                                                                                                                                                                                                                                                                                                           | C:cytoplasm; P:one-carbon metabolic process; F:methyltransferase activity; P:biosynthetic process; P:10-formyltetrahydrofolate catabolic process; F:formyltetrahydrofolate dehydrogenase activity; F:oxidoreductase activity, acting on the aldehyde or oxo group of donors, NAD or NADP as acceptor; F:hydroxymethyl-, formyl- and related transferase activity; P:methylation; P:oxidation-reduction process                                                                                                                                                                                                                                                                                                                                                                                                                                                                                                                                                                                                                                                                                                                                                                                                                                                                    |
| GSSPFG00004184001-PA   | dimethyladenosine transferase mitochondrial                | 2   | F:GO:0000179; P:GO:0031167                                                                                                                                                                                                                                                                                                                                                                                                                                                                                                           | F:rRNA (adenine-N6,N6-)-dimethyltransferase activity; P:rRNA methylation                                                                                                                                                                                                                                                                                                                                                                                                                                                                                                                                                                                                                                                                                                                                                                                                                                                                                                                                                                                                                                                                                                                                                                                                          |
| GSSPFG00019440001-PA   | dna repair protein rad51 homolog 1                         | 37  | F:GO:0000150; P:GO:0000730; C:GO:0000800; P:GO:0001932; F:GO:0003684; F:GO:0003690; F:GO:0003697; F:GO:0005524; C:GO:0005730; C:GO:0005759; C:GO:0005815; P:GO:0006268; P:GO:0006312; P:GO:0007131; F:GO:0008022; P:GO:0009636; P:GO:0010165; P:GO:0010569; C:GO:0016605; P:GO:0032200; P:GO:0042493; F:GO:0042802; F:GO:0043142; P:GO:0046686; C:GO:0048471; P:GO:0051106; P:GO:0051260; P:GO:0051597; F:GO:0070182; P:GO:0070192; P:GO:0071480; P:GO:0072711; P:GO:0072719; P:GO:0072757; P:GO:1902521; P:GO:1990414; P:GO:1990426 | F:recombinase activity; P:DNA recombinase assembly; C:lateral element; P:regulation of protein phosphorylation; F:damaged DNA binding; F:double-stranded DNA binding; F:single-stranded DNA binding; F:ATP binding; C:nucleolus; C:mitochondrial matrix; C:microtubule organizing center; P:DNA unwinding involved in DNA replication; P:mitotic recombination; P:reciprocal meiotic recombination; F:protein C-terminus binding; P:response to toxic substance; P:response to X-ray; P:regulation of double-strand break repair via homologous recombination; C:PML body; P:telomere organization; P:response to drug; F:identical protein binding; F:single-stranded DNA-dependent ATPase activity; P:response to cadmium ion; C:perinuclear region of cytoplasm; P:positive regulation of DNA ligation; P:protein homooligomerization; P:response to methylmercury; F:DNA polymerase binding; P:chromosome organization involved in meiotic cell cycle; P:cellular response to gamma radiation; P:cellular response to hydroxyurea; P:cellular response to cisplatin; P:cellular response to camptothecin; P:response to etoposide; P:replication-born double-strand break repair via sister chromatid exchange; P:mitotic recombination-dependent replication fork processing |
| GSSPFG00008879001.3-PA | e3 sumo-protein ligase pias3 isoform x2                    | 3   | P:GO:0008152; F:GO:0008270; F:GO:0019789                                                                                                                                                                                                                                                                                                                                                                                                                                                                                             | P:metabolic process; F:zinc ion binding; F:SUMO transferase activity                                                                                                                                                                                                                                                                                                                                                                                                                                                                                                                                                                                                                                                                                                                                                                                                                                                                                                                                                                                                                                                                                                                                                                                                              |
| GSSPFG00007904001-PA   | electron transfer flavoprotein-ubiquinone mitochondrial    | 3   | F:GO:0004174; F:GO:0051536; P:GO:0055114                                                                                                                                                                                                                                                                                                                                                                                                                                                                                             | F:electron-transferring-flavoprotein dehydrogenase activity; F:iron-sulfur cluster binding; P:oxidation-reduction process                                                                                                                                                                                                                                                                                                                                                                                                                                                                                                                                                                                                                                                                                                                                                                                                                                                                                                                                                                                                                                                                                                                                                         |
| GSSPFG00006413001-PA   | ethanolamine-phosphate cytidyllyltransferase               | 2   | P:GO:0009058; F:GO:0016779                                                                                                                                                                                                                                                                                                                                                                                                                                                                                                           | P:biosynthetic process; F:nucleotidyltransferase activity                                                                                                                                                                                                                                                                                                                                                                                                                                                                                                                                                                                                                                                                                                                                                                                                                                                                                                                                                                                                                                                                                                                                                                                                                         |
| GSSPFG00024615001-PA   | eukaryotic translation initiation factor 3 subunit b       | 8   | F:GO:0000166; P:GO:0001731; F:GO:0003743; C:GO:0005852; P:GO:0006446; C:GO:0016282; F:GO:0031369; C:GO:0033290                                                                                                                                                                                                                                                                                                                                                                                                                       | F:nucleotide binding; P:formation of translation preinitiation complex; F:translation initiation factor activity; C:eukaryotic translation initiation factor 3 complex; P:regulation of translational initiation; C:eukaryotic 43S preinitiation complex; F:translation initiation factor binding; C:eukaryotic 48S preinitiation complex                                                                                                                                                                                                                                                                                                                                                                                                                                                                                                                                                                                                                                                                                                                                                                                                                                                                                                                                         |
| GSSPFG00008242001.4-PA | glutathione s-transferase delta                            | 2   | F:GO:0004364; P:GO:0008152                                                                                                                                                                                                                                                                                                                                                                                                                                                                                                           | F:glutathione transferase activity; P:metabolic process                                                                                                                                                                                                                                                                                                                                                                                                                                                                                                                                                                                                                                                                                                                                                                                                                                                                                                                                                                                                                                                                                                                                                                                                                           |
| GSSPFG00008243001-PA   | glutathione s-transferase delta                            | 2   | F:GO:0004364; P:GO:0008152                                                                                                                                                                                                                                                                                                                                                                                                                                                                                                           | F:glutathione transferase activity; P:metabolic process                                                                                                                                                                                                                                                                                                                                                                                                                                                                                                                                                                                                                                                                                                                                                                                                                                                                                                                                                                                                                                                                                                                                                                                                                           |
| GSSPFG00010868001-PA   | h+ transporting atp synthase gamma subunit                 | 7   | C:GO:0000275; C:GO:0005811; P:GO:0006909; F:GO:0008553; P:GO:0015986; F:GO:0046933; F:GO:0046961                                                                                                                                                                                                                                                                                                                                                                                                                                     | C:mitochondrial proton-transporting ATP synthase complex, catalytic core F(1); C:lipid droplet; P:phagocytosis; F:proton-exporting ATPase activity, phosphorylative mechanism; P:ATP synthesis coupled proton transport; F:proton-transporting ATP synthase activity, rotational mechanism; F:proton-transporting ATPase activity, rotational mechanism                                                                                                                                                                                                                                                                                                                                                                                                                                                                                                                                                                                                                                                                                                                                                                                                                                                                                                                           |
| GSSPFG00023356001.1-PA | importin subunit beta-1 isoform x1                         | 5   | C:GO:0005622; P:GO:0006886; P:GO:0006913; F:GO:0008536; F:GO:0008565                                                                                                                                                                                                                                                                                                                                                                                                                                                                 | C:intracellular; P:intracellular protein transport; P:nucleocytoplasmic transport; F:Ran GTPase binding; F:protein transporter activity                                                                                                                                                                                                                                                                                                                                                                                                                                                                                                                                                                                                                                                                                                                                                                                                                                                                                                                                                                                                                                                                                                                                           |
| GSSPFG00034251001-PA   | intestinal mucin                                           | 3   | C:GO:0005576; P:GO:0006030; F:GO:0008061                                                                                                                                                                                                                                                                                                                                                                                                                                                                                             | C:extracellular region; P:chitin metabolic process; F:chitin binding                                                                                                                                                                                                                                                                                                                                                                                                                                                                                                                                                                                                                                                                                                                                                                                                                                                                                                                                                                                                                                                                                                                                                                                                              |
| GSSPFG00032730001-PA   | lipase                                                     | 3   | C:GO:0005576; P:GO:0008152; F:GO:0052689                                                                                                                                                                                                                                                                                                                                                                                                                                                                                             | C:extracellular region; P:metabolic process; F:carboxylic ester hydrolase activity                                                                                                                                                                                                                                                                                                                                                                                                                                                                                                                                                                                                                                                                                                                                                                                                                                                                                                                                                                                                                                                                                                                                                                                                |
| GSSPFG00023038001-PA   | organic cation transporter                                 | 1   | F:GO:0005215                                                                                                                                                                                                                                                                                                                                                                                                                                                                                                                         | F:transporter activity                                                                                                                                                                                                                                                                                                                                                                                                                                                                                                                                                                                                                                                                                                                                                                                                                                                                                                                                                                                                                                                                                                                                                                                                                                                            |
| GSSPFG00032599001-PA   | paired mesoderm homeobox protein 1                         | 3   | C:GO:0005634; P:GO:0006355; F:GO:0043565                                                                                                                                                                                                                                                                                                                                                                                                                                                                                             | C:nucleus; P:regulation of transcription, DNA-templated; F:sequence-specific DNA binding                                                                                                                                                                                                                                                                                                                                                                                                                                                                                                                                                                                                                                                                                                                                                                                                                                                                                                                                                                                                                                                                                                                                                                                          |
| GSSPFG00002429001-PA   | pleckstrin homology domain-containing family m member 1    | 3   | C:GO:0005622; F:GO:0008270; P:GO:0035556                                                                                                                                                                                                                                                                                                                                                                                                                                                                                             | C:intracellular; F:zinc ion binding; P:intracellular signal transduction                                                                                                                                                                                                                                                                                                                                                                                                                                                                                                                                                                                                                                                                                                                                                                                                                                                                                                                                                                                                                                                                                                                                                                                                          |
| GSSPFG00004485001-PA   | presequence mitochondrial                                  | 3   | P:GO:0006508; F:GO:0008237; F:GO:0046872                                                                                                                                                                                                                                                                                                                                                                                                                                                                                             | P:proteolysis; F:metallopeptidase activity; F:metal ion binding                                                                                                                                                                                                                                                                                                                                                                                                                                                                                                                                                                                                                                                                                                                                                                                                                                                                                                                                                                                                                                                                                                                                                                                                                   |
| GSSPFG00005884001.3-PA | protein aubergine-like isoform x1                          | 1   | F:GO:0003676                                                                                                                                                                                                                                                                                                                                                                                                                                                                                                                         | F:nucleic acid binding                                                                                                                                                                                                                                                                                                                                                                                                                                                                                                                                                                                                                                                                                                                                                                                                                                                                                                                                                                                                                                                                                                                                                                                                                                                            |
| GSSPFG00024299001-PA   | ribosomal protein l18a                                     | 3   | F:GO:0003735; C:GO:0005840; P:GO:0006412                                                                                                                                                                                                                                                                                                                                                                                                                                                                                             | F:structural constituent of ribosome; C:ribosome; P:translation                                                                                                                                                                                                                                                                                                                                                                                                                                                                                                                                                                                                                                                                                                                                                                                                                                                                                                                                                                                                                                                                                                                                                                                                                   |

|                        |                                                               |   |                                                                                          |                                                                                                                                                                    |
|------------------------|---------------------------------------------------------------|---|------------------------------------------------------------------------------------------|--------------------------------------------------------------------------------------------------------------------------------------------------------------------|
| GSSPFG00002705001.1-PA | ribosomal protein s2                                          | 4 | F:GO:0003723; F:GO:0003735;<br>P:GO:0006412; C:GO:0015935                                | F:RNA binding; F:structural constituent of ribosome; P:translation; C:small<br>ribosomal subunit                                                                   |
| GSSPFG00004056001-PA   | serine protease 115 isoform x1                                | 2 | F:GO:0004252; P:GO:0006508                                                               | F:serine-type endopeptidase activity; P:proteolysis                                                                                                                |
| GSSPFG00030758001-PA   | serine proteinase stubble-like                                | 1 | F:GO:0008233                                                                             | F:peptidase activity                                                                                                                                               |
| GSSPFG00031520001-PA   | succinate dehydrogenase assembly factor 2- mitochondrial-like | 5 | F:GO:0005507; C:GO:0005739;<br>P:GO:0006121; P:GO:0018293;<br>P:GO:0055070               | F:copper ion binding; C:mitochondrion; P:mitochondrial electron transport,<br>succinate to ubiquinone; P:protein-FAD linkage; P:copper ion homeostasis             |
| GSSPFG00031375001-PA   | thioredoxin domain-containing protein 17-like                 | 6 | F:GO:0004197; C:GO:0005764;<br>P:GO:0006508; P:GO:0006726;<br>P:GO:0035071; C:GO:0045169 | F:cysteine-type endopeptidase activity; C:lysosome; P:proteolysis; P:eye<br>pigment biosynthetic process; P:salivary gland cell autophagic cell death;<br>C:fusome |
| GSSPFG00035519001.3-PA | trypsin-like serine proteinase t26                            | 3 | F:GO:0004252; F:GO:0005515;<br>P:GO:0006508                                              | F:serine-type endopeptidase activity; F:protein binding; P:proteolysis                                                                                             |

---
