# Supplementary material for: Interaction of a Densovirus with Glycans of the Peritrophic Matrix Mediates Oral Infection of the Lepidopteran Pest Spodoptera frugiperda
Source: MDPI journal article supplement (doi:10.3390/v11090870), 2019-09-17
Supplement: s1 [file s1]

| Name                   | Description                                               | #GO | GO IDs                                                                                                                                   | GO Names                                                                                                                                                                                                                                                                                                             |
|------------------------|-----------------------------------------------------------|-----|------------------------------------------------------------------------------------------------------------------------------------------|----------------------------------------------------------------------------------------------------------------------------------------------------------------------------------------------------------------------------------------------------------------------------------------------------------------------|
| GSSPFG00023569001-PA   | acyl-binding protein                                      | 1   | F:GO:0000062                                                                                                                             | F:fatty-acyl-CoA binding                                                                                                                                                                                                                                                                                             |
| GSSPFG00019131001-PA   | aminopeptidase n                                          | 5   | F:GO:0004177; P:GO:0006508;<br>F:GO:0008237; F:GO:0008270;<br>C:GO:0016020                                                               | F:aminopeptidase activity; P:proteolysis; F:metallopeptidase activity; F:zinc ion binding; C:membrane                                                                                                                                                                                                                |
| GSSPFG00016399001.2-PA | d-arabinitol dehydrogenase 1-like                         | 3   | F:GO:0008270; F:GO:0016491;<br>P:GO:0055114                                                                                              | F:zinc ion binding; F:oxidoreductase activity; P:oxidation-reduction process                                                                                                                                                                                                                                         |
| GSSPFG00030737001-PA   | e3 ubiquitin-protein ligase siah1-like                    | 7   | F:GO:0004842; C:GO:0005634;<br>P:GO:0006511; P:GO:0007275;<br>F:GO:0008270; P:GO:0016567;<br>F:GO:0016874                                | F:ubiquitin-protein transferase activity; C:nucleus; P:ubiquitin-dependent protein catabolic process; P:multicellular organism development; F:zinc ion binding; P:protein ubiquitination; F:ligase activity                                                                                                          |
| GSSPFG00014785001-PA   | eukaryotic translation initiation factor 3 subunit g      | 8   | F:GO:0000166; P:GO:0001731;<br>F:GO:0003743; C:GO:0005852;<br>P:GO:0006446; F:GO:0008270;<br>C:GO:0016282; C:GO:0033290                  | F:nucleotide binding; P:formation of translation preinitiation complex; F:translation initiation factor activity; C:eukaryotic translation initiation factor 3 complex; P:regulation of translational initiation; F:zinc ion binding; C:eukaryotic 43S preinitiation complex; C:eukaryotic 48S preinitiation complex |
| GSSPFG00002382001-PA   | facilitated trehalose transporter tret1-2 homolog         | 5   | F:GO:0005355; C:GO:0005886;<br>C:GO:0016021; P:GO:0046427;<br>P:GO:0055085                                                               | F:glucose transmembrane transporter activity; C:plasma membrane; C:integral component of membrane; P:positive regulation of JAK-STAT cascade; P:transmembrane transport                                                                                                                                              |
| GSSPFG00034701001-PA   | fatty acid binding protein                                | 3   | F:GO:0005215; P:GO:0006810;<br>F:GO:0008289                                                                                              | F:transporter activity; P:transport; F:lipid binding                                                                                                                                                                                                                                                                 |
| GSSPFG00034702001-PA   | fatty acid binding protein                                | 3   | F:GO:0005215; P:GO:0006810;<br>F:GO:0008289                                                                                              | F:transporter activity; P:transport; F:lipid binding                                                                                                                                                                                                                                                                 |
| GSSPFG00026492001.1-PA | glucosylceramidase-like                                   | 3   | P:GO:0006665; F:GO:0016787;<br>P:GO:0050794                                                                                              | P:sphingolipid metabolic process; F:hydrolase activity; P:regulation of cellular process                                                                                                                                                                                                                             |
| GSSPFG00027388001-PA   | hydroxyacyl-coenzyme a dehydrogenase                      | 4   | F:GO:0003857; F:GO:0004300;<br>P:GO:0006635; C:GO:0016507                                                                                | F:3-hydroxyacyl-CoA dehydrogenase activity; F:enoyl-CoA hydratase activity; P:fatty acid beta-oxidation; C:mitochondrial fatty acid beta-oxidation multienzyme complex                                                                                                                                               |
| GSSPFG00002672001-PA   | inorganic pyrophosphatase                                 | 4   | F:GO:0000287; F:GO:0004427;<br>C:GO:0005737; P:GO:0006796                                                                                | F:magnesium ion binding; F:inorganic diphosphatase activity; C:cytoplasm; P:phosphate-containing compound metabolic process                                                                                                                                                                                          |
| GSSPFG00032730001-PA   | lipase                                                    | 3   | C:GO:0005576; P:GO:0008152;<br>F:GO:0052689                                                                                              | C:extracellular region; P:metabolic process; F:carboxylic ester hydrolase activity                                                                                                                                                                                                                                   |
| GSSPFG00028977001-PA   | nitric oxide synthase                                     | 9   | F:GO:0004517; F:GO:0005506;<br>F:GO:0005516; P:GO:0006809;<br>F:GO:0010181; F:GO:0020037;<br>F:GO:0050660; F:GO:0050661;<br>P:GO:0055114 | F:nitric-oxide synthase activity; F:iron ion binding; F:calmodulin binding; P:nitric oxide biosynthetic process; F:FMN binding; F:heme binding; F:flavin adenine dinucleotide binding; F:NADP binding; P:oxidation-reduction process                                                                                 |
| GSSPFG00019809001-PA   | nose resistant to fluoxetine protein 6-like               | 2   | P:GO:0008152; F:GO:0016747                                                                                                               | P:metabolic process; F:transferase activity, transferring acyl groups other than amino-acyl groups                                                                                                                                                                                                                   |
| GSSPFG00005109001-PA   | pancreatic triacylglycerol lipase-like                    | 3   | C:GO:0005576; P:GO:0008152;<br>F:GO:0052689                                                                                              | C:extracellular region; P:metabolic process; F:carboxylic ester hydrolase activity                                                                                                                                                                                                                                   |
| GSSPFG00009950001-PA   | pancreatic triacylglycerol lipase-like                    | 3   | C:GO:0005576; P:GO:0008152;<br>F:GO:0052689                                                                                              | C:extracellular region; P:metabolic process; F:carboxylic ester hydrolase activity                                                                                                                                                                                                                                   |
| GSSPFG00034748001-PA   | parathyroid hormone-responsive b1                         | 1   | C:GO:0034464                                                                                                                             | C:BBSome                                                                                                                                                                                                                                                                                                             |
| GSSPFG00009935001.1-PA | protein aatf                                              | 1   | C:GO:0005634                                                                                                                             | C:nucleus                                                                                                                                                                                                                                                                                                            |
| GSSPFG00008671001-PA   | protein rop isoform x1                                    | 2   | C:GO:0005623; P:GO:0006904                                                                                                               | C:cell; P:vesicle docking involved in exocytosis                                                                                                                                                                                                                                                                     |
| GSSPFG00015295001-PA   | rna polymerase ii transcriptional coactivator             | 3   | F:GO:0003677; F:GO:0003713;<br>P:GO:0006355                                                                                              | F:DNA binding; F:transcription coactivator activity; P:regulation of transcription, DNA-templated                                                                                                                                                                                                                    |
| GSSPFG00018170001-PA   | sterol carrier protein 2 3-oxoacyl- thiolase              | 7   | F:GO:0005548; C:GO:0005739;<br>C:GO:0005777; C:GO:0005811;<br>P:GO:0008152; P:GO:0015914;<br>F:GO:0016747                                | F:phospholipid transporter activity; C:mitochondrion; C:peroxisome; C:lipid droplet; P:metabolic process; P:phospholipid transport; F:transferase activity, transferring acyl groups other than amino-acyl groups                                                                                                    |
| GSSPFG00027537001-PA   | transmembrane protein 14c                                 | 1   | C:GO:0016021                                                                                                                             | C:integral component of membrane                                                                                                                                                                                                                                                                                     |
| GSSPFG00010017001-PA   | trna pseudouridine synthase mitochondrial-like isoform x1 | 5   | P:GO:0001522; F:GO:0003723;<br>F:GO:0004730; P:GO:0008033;<br>F:GO:0009982                                                               | P:pseudouridine synthesis; F:RNA binding; F:pseudouridylate synthase activity; P:tRNA processing; F:pseudouridine synthase activity                                                                                                                                                                                  |
| GSSPFG00030048001.3-PA | trypsin-like serine protease                              | 2   | F:GO:0004252; P:GO:0006508                                                                                                               | F:serine-type endopeptidase activity; P:proteolysis                                                                                                                                                                                                                                                                  |
| GSSPFG00027850001-PA   | uncharacterized peptidase c1-like protein isoform x2      | 6   | F:GO:0005044; P:GO:0006508;<br>P:GO:0006898; P:GO:0006955;<br>F:GO:0008234; F:GO:0030247                                                 | F:scavenger receptor activity; P:proteolysis; P:receptor-mediated endocytosis; P:immune response; F:cysteine-type peptidase activity; F:polysaccharide binding                                                                                                                                                       |
| GSSPFG00012410001-PA   | uncharacterized protein loc101739891                      | 1   | C:GO:0016020                                                                                                                             | C:membrane                                                                                                                                                                                                                                                                                                           |
| GSSPFG00034417001-PA   | uv opsin                                                  | 7   | F:GO:0004930; P:GO:0007186;<br>P:GO:0007601; P:GO:0007602;<br>F:GO:0009881; C:GO:0016021;<br>P:GO:0018298                                | F:G protein-coupled receptor activity; P:G protein-coupled receptor signaling pathway; P:visual perception; P:phototransduction; F:photoreceptor activity; C:integral component of membrane; P:protein-chromophore linkage                                                                                           |
| GSSPFG00014231001-PA   | v-type proton atpase subunit e                            | 4   | P:GO:0008152; P:GO:0015991;<br>C:GO:0033178; F:GO:0046961                                                                                | P:metabolic process; P:ATP hydrolysis coupled proton transport; C:proton-transporting two-sector ATPase complex, catalytic domain; F:proton-transporting ATPase activity, rotational mechanism                                                                                                                       |
