# Supplementary material for: Interaction of a Densovirus with Glycans of the Peritrophic Matrix Mediates Oral Infection of the Lepidopteran Pest Spodoptera frugiperda
Source: MDPI journal article supplement (doi:10.3390/v11090870), 2019-09-17
Supplement: s1 [file s1]

| Name                   | Description                                                | #GO | GO IDs                                                                                                                                                                                                                                                                                                                                                                                                               | GO Names                                                                                                                                                                                                                                                                                                                                                                                                                                                                                                                                                                                                                                                                                                                                                                                                                                                                                                                                                                           |
|------------------------|------------------------------------------------------------|-----|----------------------------------------------------------------------------------------------------------------------------------------------------------------------------------------------------------------------------------------------------------------------------------------------------------------------------------------------------------------------------------------------------------------------|------------------------------------------------------------------------------------------------------------------------------------------------------------------------------------------------------------------------------------------------------------------------------------------------------------------------------------------------------------------------------------------------------------------------------------------------------------------------------------------------------------------------------------------------------------------------------------------------------------------------------------------------------------------------------------------------------------------------------------------------------------------------------------------------------------------------------------------------------------------------------------------------------------------------------------------------------------------------------------|
| GSSPFG00023167001-PA   | 39s ribosomal protein mitochondrial                        | 1   | C:GO:0005840                                                                                                                                                                                                                                                                                                                                                                                                         | C:ribosome                                                                                                                                                                                                                                                                                                                                                                                                                                                                                                                                                                                                                                                                                                                                                                                                                                                                                                                                                                         |
| GSSPFG00026398001.1-PA | 39s ribosomal protein mitochondrial                        | 4   | F:GO:0003723; F:GO:0003735; C:GO:0005762; P:GO:0006412                                                                                                                                                                                                                                                                                                                                                               | F:RNA binding; F:structural constituent of ribosome; C:mitochondrial large ribosomal subunit; P:translation                                                                                                                                                                                                                                                                                                                                                                                                                                                                                                                                                                                                                                                                                                                                                                                                                                                                        |
| GSSPFG00006068001-PA   | 40s ribosomal protein s11                                  | 3   | F:GO:0003735; C:GO:0005840; P:GO:0006412                                                                                                                                                                                                                                                                                                                                                                             | F:structural constituent of ribosome; C:ribosome; P:translation                                                                                                                                                                                                                                                                                                                                                                                                                                                                                                                                                                                                                                                                                                                                                                                                                                                                                                                    |
| GSSPFG00032780001.1-PA | 40s ribosomal protein s13                                  | 16  | P:GO:0000184; F:GO:0003729; F:GO:0003735; F:GO:0005515; C:GO:0005730; C:GO:0005925; P:GO:0006413; C:GO:0006414; P:GO:0006415; P:GO:0006614; C:GO:0016020; P:GO:0019083; C:GO:0022627; P:GO:0033119; C:GO:0070062; F:GO:0070181                                                                                                                                                                                       | P:nuclear-transcribed mRNA catabolic process, nonsense-mediated decay; F:mRNA binding; F:structural constituent of ribosome; F:protein binding; C:nucleolus; C:focal adhesion; P:translational initiation; P:translational elongation; P:translational termination; P:SRP-dependent cotranslational protein targeting to membrane; C:membrane; P:viral transcription; C:cytosolic small ribosomal subunit; P:negative regulation of RNA splicing; C:extracellular exosome; F:small ribosomal subunit rRNA binding                                                                                                                                                                                                                                                                                                                                                                                                                                                                  |
| GSSPFG00007084001-PA   | 40s ribosomal protein s28                                  | 6   | P:GO:0002181; F:GO:0003735; P:GO:0006355; P:GO:0006407; C:GO:0022627; C:GO:0043189                                                                                                                                                                                                                                                                                                                                   | P:cytoplasmic translation; F:structural constituent of ribosome; P:regulation of transcription, DNA-templated; P:rRNA export from nucleus; C:cytosolic small ribosomal subunit; C:H4/H2A histone acetyltransferase complex                                                                                                                                                                                                                                                                                                                                                                                                                                                                                                                                                                                                                                                                                                                                                         |
| GSSPFG00013754001-PA   | 4-hydroxybutyrate -transferase                             | 7   | C:GO:0005739; C:GO:0005811; C:GO:0005829; P:GO:0006084; F:GO:0008411; F:GO:0016787; P:GO:0022008                                                                                                                                                                                                                                                                                                                     | C:mitochondrion; C:lipid droplet; C:cytosol; P:acetyl-CoA metabolic process; F:4-hydroxybutyrate CoA-transferase activity; F:hydrolase activity; P:neurogenesis                                                                                                                                                                                                                                                                                                                                                                                                                                                                                                                                                                                                                                                                                                                                                                                                                    |
| GSSPFG00014527001-PA   | 60s ribosomal protein l10a                                 | 4   | F:GO:0003723; F:GO:0003735; P:GO:0006412; C:GO:0015934                                                                                                                                                                                                                                                                                                                                                               | F:RNA binding; F:structural constituent of ribosome; P:translation; C:large ribosomal subunit                                                                                                                                                                                                                                                                                                                                                                                                                                                                                                                                                                                                                                                                                                                                                                                                                                                                                      |
| GSSPFG00007050001-PA   | 60s ribosomal protein l10a                                 | 4   | F:GO:0003723; F:GO:0003735; P:GO:0006412; C:GO:0015934                                                                                                                                                                                                                                                                                                                                                               | F:RNA binding; F:structural constituent of ribosome; P:translation; C:large ribosomal subunit                                                                                                                                                                                                                                                                                                                                                                                                                                                                                                                                                                                                                                                                                                                                                                                                                                                                                      |
| GSSPFG00011770001-PA   | acetylcholine receptor subunit alpha-like isoform x2       | 5   | C:GO:0016021; F:GO:0022848; C:GO:0030054; C:GO:0045211; P:GO:0098655                                                                                                                                                                                                                                                                                                                                                 | C:integral component of membrane; F:acetylcholine-gated cation-selective channel activity; C:cell junction; C:postsynaptic membrane; P:cation transmembrane transport                                                                                                                                                                                                                                                                                                                                                                                                                                                                                                                                                                                                                                                                                                                                                                                                              |
| GSSPFG000023569001-PA  | acyl-binding protein                                       | 1   | F:GO:0000062                                                                                                                                                                                                                                                                                                                                                                                                         | F:fatty-acyl-CoA binding                                                                                                                                                                                                                                                                                                                                                                                                                                                                                                                                                                                                                                                                                                                                                                                                                                                                                                                                                           |
| GSSPFG00016217001-PA   | adenine nucleotide translocase insect2                     | 27  | P:GO:0001508; F:GO:0003676; F:GO:0005471; C:GO:0005743; C:GO:0005811; P:GO:0006839; P:GO:0007268; P:GO:0007629; P:GO:0008340; P:GO:0009612; P:GO:0010507; P:GO:0015074; P:GO:0015866; P:GO:0015867; C:GO:0016021; P:GO:0034599; P:GO:0040011; P:GO:0046716; P:GO:0048477; P:GO:0048489; P:GO:0051124; P:GO:0051480; P:GO:0051560; P:GO:0051900; P:GO:0055085; P:GO:0070050; P:GO:2001171                             | P:action potential; F:nucleic acid binding; F:ATP:ADP antiporter activity; C:mitochondrial inner membrane; C:lipid droplet; P:mitochondrial transport; P:chemical synaptic transmission; P:flight behavior; P:determination of adult lifespan; P:response to mechanical stimulus; P:negative regulation of autophagy; P:DNA integration; P:ADP transport; P:ATP transport; C:integral component of membrane; P:cellular response to oxidative stress; P:locomotion; P:muscle cell cellular homeostasis; P:oogenesis; P:synaptic vesicle transport; P:synaptic growth at neuromuscular junction; P:regulation of cytosolic calcium ion concentration; P:mitochondrial calcium ion homeostasis; P:regulation of mitochondrial depolarization; P:transmembrane transport; P:neuron cellular homeostasis; P:positive regulation of ATP biosynthetic process                                                                                                                            |
| GSSPFG00016760001-PA   | aldehyde dehydrogenase family 7 member a1 homolog          | 5   | C:GO:0016021; F:GO:0016620; F:GO:0022857; P:GO:0055085; P:GO:0055114                                                                                                                                                                                                                                                                                                                                                 | C:integral component of membrane; F:oxidoreductase activity, acting on the aldehyde or oxo group of donors, NAD or NADP as acceptor; F:transmembrane transporter activity; P:transmembrane transport; P:oxidation-reduction process                                                                                                                                                                                                                                                                                                                                                                                                                                                                                                                                                                                                                                                                                                                                                |
| GSSPFG00011282001-PA   | alpha-mannosyltransferase alg2                             | 6   | F:GO:0004378; C:GO:0005811; P:GO:0009058; C:GO:0012505; F:GO:0033164; P:GO:0097502                                                                                                                                                                                                                                                                                                                                   | F:GDP-Man:Man1GlcNAc2-PP-Dol alpha-1,3-mannosyltransferase activity; C:lipid droplet; P:biosynthetic process; C:endomembrane system; F:glycolipid 6-alpha-mannosyltransferase activity; P:mannosylation                                                                                                                                                                                                                                                                                                                                                                                                                                                                                                                                                                                                                                                                                                                                                                            |
| GSSPFG00004595001-PA   | aminopeptidase n                                           | 2   | F:GO:0046872; F:GO:0070011                                                                                                                                                                                                                                                                                                                                                                                           | F:metal ion binding; F:peptidase activity, acting on L-amino acid peptides                                                                                                                                                                                                                                                                                                                                                                                                                                                                                                                                                                                                                                                                                                                                                                                                                                                                                                         |
| GSSPFG00007626001-PA   | atp synthase subunit mitochondrial                         | 3   | C:GO:0000276; F:GO:0015078; P:GO:0015986                                                                                                                                                                                                                                                                                                                                                                             | C:mitochondrial proton-transporting ATP synthase complex, coupling factor F(o); F:proton transmembrane transporter activity; P:ATP synthesis coupled proton transport                                                                                                                                                                                                                                                                                                                                                                                                                                                                                                                                                                                                                                                                                                                                                                                                              |
| GSSPFG00008485001-PA   | atp synthase subunit mitochondrial                         | 3   | C:GO:0000276; F:GO:0015078; P:GO:0015986                                                                                                                                                                                                                                                                                                                                                                             | C:mitochondrial proton-transporting ATP synthase complex, coupling factor F(o); F:proton transmembrane transporter activity; P:ATP synthesis coupled proton transport                                                                                                                                                                                                                                                                                                                                                                                                                                                                                                                                                                                                                                                                                                                                                                                                              |
| GSSPFG00033909001-PA   | atp synthase subunit mitochondrial                         | 3   | C:GO:0000276; F:GO:0015078; P:GO:0015986                                                                                                                                                                                                                                                                                                                                                                             | C:mitochondrial proton-transporting ATP synthase complex, coupling factor F(o); F:proton transmembrane transporter activity; P:ATP synthesis coupled proton transport                                                                                                                                                                                                                                                                                                                                                                                                                                                                                                                                                                                                                                                                                                                                                                                                              |
| GSSPFG00017555001.4-PA | atp-binding cassette sub-family a member 5-like isoform x1 | 6   | F:GO:0005215; F:GO:0005524; P:GO:0006810; P:GO:0008152; C:GO:0016021; F:GO:0016887                                                                                                                                                                                                                                                                                                                                   | F:transporter activity; F:ATP binding; P:transport; P:metabolic process; C:integral component of membrane; F:ATPase activity                                                                                                                                                                                                                                                                                                                                                                                                                                                                                                                                                                                                                                                                                                                                                                                                                                                       |
| GSSPFG00029664001-PA   | b-cell cll lymphoma 7 protein family member b              | 2   | F:GO:0003676; F:GO:0046872                                                                                                                                                                                                                                                                                                                                                                                           | F:nucleic acid binding; F:metal ion binding                                                                                                                                                                                                                                                                                                                                                                                                                                                                                                                                                                                                                                                                                                                                                                                                                                                                                                                                        |
| GSSPFG00031255001-PA   | bess motif-containing partial                              | 1   | F:GO:0003677                                                                                                                                                                                                                                                                                                                                                                                                         | F:DNA binding                                                                                                                                                                                                                                                                                                                                                                                                                                                                                                                                                                                                                                                                                                                                                                                                                                                                                                                                                                      |
| GSSPFG00004769001-PA   | cadherin-87a                                               | 2   | P:GO:0007155; C:GO:0016020                                                                                                                                                                                                                                                                                                                                                                                           | P:cell adhesion; C:membrane                                                                                                                                                                                                                                                                                                                                                                                                                                                                                                                                                                                                                                                                                                                                                                                                                                                                                                                                                        |
| GSSPFG00001835001.3-PA | carboxyl choline esterase cce016b                          | 2   | P:GO:0008152; F:GO:0016787                                                                                                                                                                                                                                                                                                                                                                                           | P:metabolic process; F:hydrolase activity                                                                                                                                                                                                                                                                                                                                                                                                                                                                                                                                                                                                                                                                                                                                                                                                                                                                                                                                          |
| GSSPFG00002450001-PA   | carboxylesterase                                           | 2   | P:GO:0008152; F:GO:0016787                                                                                                                                                                                                                                                                                                                                                                                           | P:metabolic process; F:hydrolase activity                                                                                                                                                                                                                                                                                                                                                                                                                                                                                                                                                                                                                                                                                                                                                                                                                                                                                                                                          |
| GSSPFG00006714001-PA   | catalase                                                   | 13  | F:GO:0004096; F:GO:0005515; P:GO:0006979; P:GO:0009987; F:GO:0020037; C:GO:0043231; P:GO:0044238; P:GO:0044260; C:GO:0044444; F:GO:0046872; P:GO:0050794; P:GO:0055114; P:GO:1901360                                                                                                                                                                                                                                 | F:catalase activity; F:protein binding; P:response to oxidative stress; P:cellular process; F:heme binding; C:intracellular membrane-bounded organelle; P:primary metabolic process; P:cellular macromolecule metabolic process; C:cytoplasmic part; F:metal ion binding; P:regulation of cellular process; P:oxidation-reduction process; P:organic cyclic compound metabolic process                                                                                                                                                                                                                                                                                                                                                                                                                                                                                                                                                                                             |
| GSSPFG00008368001-PA   | cg3595                                                     | 29  | P:GO:0000281; P:GO:0001736; P:GO:0003384; F:GO:0005509; C:GO:0005911; C:GO:0005912; C:GO:0005938; P:GO:0007298; C:GO:0016324; C:GO:0016460; C:GO:0016461; P:GO:0019749; C:GO:0030496; P:GO:0031036; C:GO:0031941; F:GO:0032036; C:GO:0032154; P:GO:0032956; P:GO:0035148; P:GO:0035159; C:GO:0035183; P:GO:0035191; P:GO:0035277; P:GO:0035317; P:GO:0042060; C:GO:0048471; C:GO:0051233; P:GO:0060288; P:GO:0090254 | P:mitotic cytokinesis; P:establishment of planar polarity; P:apical constriction involved in gastrulation; F:calcium ion binding; C:cell-cell junction; C:cadherens junction; C:cell cortex; P:border follicle cell migration; C:apical plasma membrane; C:myosin II complex; C:unconventional myosin complex; C:cytoskeleton-dependent cytoplasmic transport, nurse cell to oocyte; C:midbody; P:myosin II filament assembly; C:filamentous actin; F:myosin heavy chain binding; C:cleavage furrow; P:regulation of actin cytoskeleton organization; P:tube formation; P:regulation of tube length, open tracheal system; C:female germline ring canal inner rim; P:nuclear axial expansion; P:spiracle morphogenesis, open tracheal system; P:imaginal disc-derived wing hair organization; P:wound healing; C:perinuclear region of cytoplasm; C:spindle midzone; P:formation of a compartment boundary; P:cell elongation involved in imaginal disc-derived wing morphogenesis |
| GSSPFG00034353001.4-PA | chymotrypsin-like protease                                 | 2   | F:GO:0004252; P:GO:0006508                                                                                                                                                                                                                                                                                                                                                                                           | F:serine-type endopeptidase activity; P:proteolysis                                                                                                                                                                                                                                                                                                                                                                                                                                                                                                                                                                                                                                                                                                                                                                                                                                                                                                                                |

|                         |                                                                              |    |                                                                                                                                                                                                                                              |                                                                                                                                                                                                                                                                                                                                                                                                                                                                            |
|-------------------------|------------------------------------------------------------------------------|----|----------------------------------------------------------------------------------------------------------------------------------------------------------------------------------------------------------------------------------------------|----------------------------------------------------------------------------------------------------------------------------------------------------------------------------------------------------------------------------------------------------------------------------------------------------------------------------------------------------------------------------------------------------------------------------------------------------------------------------|
| GSSPFG00034354001.3-PA  | chymotrypsin-like protease                                                   | 2  | F:GO:0004252; P:GO:0006508                                                                                                                                                                                                                   | F:serine-type endopeptidase activity; P:proteolysis                                                                                                                                                                                                                                                                                                                                                                                                                        |
| GSSPFG00022970001.3-PA  | chymotrypsin-like protease                                                   | 2  | F:GO:0004252; P:GO:0006508                                                                                                                                                                                                                   | F:serine-type endopeptidase activity; P:proteolysis                                                                                                                                                                                                                                                                                                                                                                                                                        |
| GSSPFG00022971001.4-PA  | chymotrypsin-like protease                                                   | 2  | F:GO:0004252; P:GO:0006508                                                                                                                                                                                                                   | F:serine-type endopeptidase activity; P:proteolysis                                                                                                                                                                                                                                                                                                                                                                                                                        |
| GSSPFG00034358001.3-PA  | chymotrypsin-like serine protease                                            | 2  | F:GO:0004252; P:GO:0006508                                                                                                                                                                                                                   | F:serine-type endopeptidase activity; P:proteolysis                                                                                                                                                                                                                                                                                                                                                                                                                        |
| GSSPFG00013450001.3-PA  | chymotrypsin-like serine protease precursor                                  | 2  | F:GO:0004252; P:GO:0006508                                                                                                                                                                                                                   | F:serine-type endopeptidase activity; P:proteolysis                                                                                                                                                                                                                                                                                                                                                                                                                        |
| GSSPFG00011996001-PA    | copper transport protein atox1                                               | 2  | P:GO:0030001; F:GO:0046872                                                                                                                                                                                                                   | P:metal ion transport; F:metal ion binding                                                                                                                                                                                                                                                                                                                                                                                                                                 |
| GSSPFG00014584001.1-PA  | cystathionine gamma-lyase                                                    | 3  | P:GO:0008152; F:GO:0016829; F:GO:0030170                                                                                                                                                                                                     | P:metabolic process; F:lyase activity; F:pyridoxal phosphate binding                                                                                                                                                                                                                                                                                                                                                                                                       |
| GSSPFG00020109001.4-PB  | cytochrome p450                                                              | 5  | F:GO:0005506; C:GO:0005789; F:GO:0020037; P:GO:0055114; F:GO:0070330                                                                                                                                                                         | F:iron ion binding; C:endoplasmic reticulum membrane; F:heme binding; P:oxidation-reduction process; F:aromatase activity                                                                                                                                                                                                                                                                                                                                                  |
| GSSPFG00027565001.2-PA  | cytochrome p450                                                              | 5  | F:GO:0004497; F:GO:0005506; F:GO:0016705; F:GO:0020037; P:GO:0055114                                                                                                                                                                         | F:monooxygenase activity; F:iron ion binding; F:oxidoreductase activity, acting on paired donors, with incorporation or reduction of molecular oxygen; F:heme binding; P:oxidation-reduction process                                                                                                                                                                                                                                                                       |
| GSSPFG00014493001.3-PB  | cytochrome p450 cyp314a1                                                     | 4  | F:GO:0004501; F:GO:0005506; F:GO:0020037; P:GO:0055114                                                                                                                                                                                       | F:ecdysone 20-monooxygenase activity; F:iron ion binding; F:heme binding; P:oxidation-reduction process                                                                                                                                                                                                                                                                                                                                                                    |
| GSSPFG00014405001-PA    | dipeptidyl peptidase 4                                                       | 3  | P:GO:0006508; F:GO:0008236; C:GO:0016020                                                                                                                                                                                                     | P:proteolysis; F:serine-type peptidase activity; C:membrane                                                                                                                                                                                                                                                                                                                                                                                                                |
| GSSPFG00020627001-PA    | dj-1 beta                                                                    | 5  | P:GO:0008344; P:GO:0042775; P:GO:0046626; P:GO:0048640; P:GO:0070301                                                                                                                                                                         | P:adult locomotory behavior; P:mitochondrial ATP synthesis coupled electron transport; P:regulation of insulin receptor signaling pathway; P:negative regulation of developmental growth; P:cellular response to hydrogen peroxide                                                                                                                                                                                                                                         |
| GSSPFG000005701001-PA   | dopamine n-acetyltransferase-like                                            | 2  | F:GO:0008080; P:GO:0008152                                                                                                                                                                                                                   | F:N-acetyltransferase activity; P:metabolic process                                                                                                                                                                                                                                                                                                                                                                                                                        |
| GSSPFG00003027001-PA    | drip protein                                                                 | 3  | F:GO:0005215; P:GO:0006810; C:GO:0016021                                                                                                                                                                                                     | F:transporter activity; P:transport; C:integral component of membrane                                                                                                                                                                                                                                                                                                                                                                                                      |
| GSSPFG00028772001-PA    | e3 ubiquitin-protein ligase mycbp2 isoform x1                                | 2  | F:GO:0004842; P:GO:0016567                                                                                                                                                                                                                   | F:ubiquitin-protein transferase activity; P:protein ubiquitination                                                                                                                                                                                                                                                                                                                                                                                                         |
| GSSPFG00015967001.1-PA  | e3 ubiquitin-protein ligase trip12 isoform x1                                | 8  | F:GO:0004842; F:GO:0005096; C:GO:0005622; F:GO:0008270; P:GO:0016567; F:GO:0016874; P:GO:0035556; P:GO:0043547                                                                                                                               | F:ubiquitin-protein transferase activity; F:GTPase activator activity; C:intracellular; F:zinc ion binding; P:protein ubiquitination; F:ligase activity; P:intracellular signal transduction; P:positive regulation of GTPase activity                                                                                                                                                                                                                                     |
| GSSPFG00004783001.1-PA  | e3 ubiquitin-protein ligase trip12 isoform x1                                | 3  | F:GO:0004842; P:GO:0016567; F:GO:0016874                                                                                                                                                                                                     | F:ubiquitin-protein transferase activity; P:protein ubiquitination; F:ligase activity                                                                                                                                                                                                                                                                                                                                                                                      |
| GSSPFG00002850001.3-PA  | epithelial membrane protein                                                  | 6  | F:GO:0005044; C:GO:0005764; C:GO:0005887; P:GO:0006952; P:GO:0007155; P:GO:0035071                                                                                                                                                           | F:scavenger receptor activity; C:lysosome; C:integral component of plasma membrane; P:defense response; P:cell adhesion; P:salivary gland cell autophagic cell death                                                                                                                                                                                                                                                                                                       |
| GSSPFG000007711001-PA   | eukaryotic peptide chain release factor gtp-binding subunit erf3a isoform x1 | 7  | F:GO:0003746; F:GO:0003747; F:GO:0003924; F:GO:0005525; C:GO:0005829; P:GO:0006414; P:GO:0006415                                                                                                                                             | F:translation elongation factor activity; F:translation release factor activity; F:GTPase activity; F:GTP binding; C:cytosol; P:translational elongation; P:translational termination                                                                                                                                                                                                                                                                                      |
| GSSPFG00034701001-PA    | fatty acid binding protein                                                   | 3  | F:GO:0005215; P:GO:0006810; F:GO:0008289                                                                                                                                                                                                     | F:transporter activity; P:transport; F:lipid binding                                                                                                                                                                                                                                                                                                                                                                                                                       |
| GSSPFG00034702001-PA    | fatty acid binding protein                                                   | 3  | F:GO:0005215; P:GO:0006810; F:GO:0008289                                                                                                                                                                                                     | F:transporter activity; P:transport; F:lipid binding                                                                                                                                                                                                                                                                                                                                                                                                                       |
| GSSPFG00029716001.2-PA  | fatty acid binding protein                                                   | 3  | F:GO:0005215; P:GO:0006810; F:GO:0008289                                                                                                                                                                                                     | F:transporter activity; P:transport; F:lipid binding                                                                                                                                                                                                                                                                                                                                                                                                                       |
| GSSPFG00014800001-PA    | fibrillin-2-like                                                             | 3  | F:GO:0005201; F:GO:0005509; C:GO:0031012                                                                                                                                                                                                     | F:extracellular matrix structural constituent; F:calcium ion binding; C:extracellular matrix                                                                                                                                                                                                                                                                                                                                                                               |
| GSSPFG00020100001-PA    | gag-pol polyprotein                                                          | 1  | F:GO:0016787                                                                                                                                                                                                                                 | F:hydrolase activity                                                                                                                                                                                                                                                                                                                                                                                                                                                       |
| GSSPFG00028012001-PA    | gdp-d-glucose phosphorylase 1                                                | 2  | P:GO:0008152; F:GO:0016740                                                                                                                                                                                                                   | P:metabolic process; F:transferase activity                                                                                                                                                                                                                                                                                                                                                                                                                                |
| GSSPFG00026650001-PA    | glucose-dependent insulinotropic receptor-like                               | 3  | F:GO:0004930; P:GO:0007186; C:GO:0016021                                                                                                                                                                                                     | F:G protein-coupled receptor activity; P:G protein-coupled receptor signaling pathway; C:integral component of membrane                                                                                                                                                                                                                                                                                                                                                    |
| GSSPFG00026492001.1-PA  | glucosylceramidase-like                                                      | 3  | P:GO:0006665; F:GO:0016787; P:GO:0050794                                                                                                                                                                                                     | P:sphingolipid metabolic process; F:hydrolase activity; P:regulation of cellular process                                                                                                                                                                                                                                                                                                                                                                                   |
| GSSPFG00003077001.5-PA  | glutathione s-transferase                                                    | 2  | F:GO:0004364; P:GO:0008152                                                                                                                                                                                                                   | F:glutathione transferase activity; P:metabolic process                                                                                                                                                                                                                                                                                                                                                                                                                    |
| GSSPFG00021491001.3-PA  | growth hormone-inducible transmembrane                                       | 1  | C:GO:0016021                                                                                                                                                                                                                                 | C:integral component of membrane                                                                                                                                                                                                                                                                                                                                                                                                                                           |
| GSSPFG00033217001-PA    | gtp-binding protein 128up                                                    | 1  | F:GO:0005525                                                                                                                                                                                                                                 | F:GTP binding                                                                                                                                                                                                                                                                                                                                                                                                                                                              |
| GSSPFG00000050001-PA    | gtp-binding protein rad                                                      | 6  | F:GO:0003924; F:GO:0005525; C:GO:0005622; P:GO:0007264; C:GO:0016020; P:GO:1901386                                                                                                                                                           | F:GTPase activity; F:GTP binding; C:intracellular; P:small GTPase mediated signal transduction; C:membrane; P:negative regulation of voltage-gated calcium channel activity                                                                                                                                                                                                                                                                                                |
| GSSPFG00024799001-PA    | guanine nucleotide exchange factor dbs-like isoform x3                       | 1  | P:GO:0050789                                                                                                                                                                                                                                 | P:regulation of biological process                                                                                                                                                                                                                                                                                                                                                                                                                                         |
| GSSPFG00015723001.3-PA  | heat shock 70 kda protein 14                                                 | 2  | F:GO:0005524; C:GO:0005737                                                                                                                                                                                                                   | F:ATP binding; C:cyttoplasm                                                                                                                                                                                                                                                                                                                                                                                                                                                |
| GSSPFG00013616001-PA    | heat shock protein 70                                                        | 17 | F:GO:0003723; F:GO:0005524; C:GO:0005730; C:GO:0005925; P:GO:0006457; P:GO:0006611; P:GO:0006626; P:GO:0009636; F:GO:0017134; F:GO:0031072; F:GO:0031625; C:GO:0042645; P:GO:0043066; C:GO:0043209; F:GO:0051082; C:GO:0070062; P:GO:0071347 | F:RNA binding; F:ATP binding; C:nucleolus; C:focal adhesion; P:protein folding; P:protein export from nucleus; P:protein targeting to mitochondrion; P:response to toxic substance; F:fibroblast growth factor binding; F:heat shock protein binding; F:ubiquitin protein ligase binding; C:mitochondrial nucleoid; P:negative regulation of apoptotic process; C:myelin sheath; F:unfolded protein binding; C:extracellular exosome; P:cellular response to interleukin-1 |
| GSSPFG000001676001-PA   | heme oxygenase                                                               | 3  | F:GO:0004392; P:GO:0006788; F:GO:0046872                                                                                                                                                                                                     | F:heme oxygenase (decyclizing) activity; P:heme oxidation; F:metal ion binding                                                                                                                                                                                                                                                                                                                                                                                             |
| GSSPFG00026171001-PA    | high affinity copper uptake protein 1 isoform x2                             | 3  | F:GO:0005375; C:GO:0016021; P:GO:0035434                                                                                                                                                                                                     | F:copper ion transmembrane transporter activity; C:integral component of membrane; P:copper ion transmembrane transport                                                                                                                                                                                                                                                                                                                                                    |
| GSSPFG000008731001.2-PA | hox cluster protein                                                          | 5  | C:GO:0005634; P:GO:0006355; P:GO:0007275; F:GO:0043565; P:GO:0048856                                                                                                                                                                         | C:nucleus; P:regulation of transcription, DNA-templated; P:multicellular organism development; F:sequence-specific DNA binding; P:anatomical structure development                                                                                                                                                                                                                                                                                                         |
| GSSPFG00007187001-PA    | islet cell autoantigen 1                                                     | 2  | F:GO:0019904; P:GO:0046928                                                                                                                                                                                                                   | F:protein domain specific binding; P:regulation of neurotransmitter secretion                                                                                                                                                                                                                                                                                                                                                                                              |
| GSSPFG000005709001-PA   | leukocyte receptor cluster member 8 homolog isoform x2                       | 1  | F:GO:0016740                                                                                                                                                                                                                                 | F:transferase activity                                                                                                                                                                                                                                                                                                                                                                                                                                                     |
| GSSPFG000015310001-PA   | lim and senescent cell antigen-like-containing domain protein 1 isoform x3   | 2  | F:GO:0008270; P:GO:0046854                                                                                                                                                                                                                   | F:zinc ion binding; P:phosphatidylinositol phosphorylation                                                                                                                                                                                                                                                                                                                                                                                                                 |

|                        |                                                        |    |                                                                                                                                                                                                                                                                                                                                                                                                                                                                              |                                                                                                                                                                                                                                                                                                                                                                                                                                                                                                                                                                                                                                                                                                                                                                                                                                                                                                                                                                                                                                                                                                                                  |
|------------------------|--------------------------------------------------------|----|------------------------------------------------------------------------------------------------------------------------------------------------------------------------------------------------------------------------------------------------------------------------------------------------------------------------------------------------------------------------------------------------------------------------------------------------------------------------------|----------------------------------------------------------------------------------------------------------------------------------------------------------------------------------------------------------------------------------------------------------------------------------------------------------------------------------------------------------------------------------------------------------------------------------------------------------------------------------------------------------------------------------------------------------------------------------------------------------------------------------------------------------------------------------------------------------------------------------------------------------------------------------------------------------------------------------------------------------------------------------------------------------------------------------------------------------------------------------------------------------------------------------------------------------------------------------------------------------------------------------|
| GSSPFG00032730001-PA   | lipase                                                 | 3  | C:GO:0005576; P:GO:0008152; F:GO:0052689                                                                                                                                                                                                                                                                                                                                                                                                                                     | C:extracellular region; P:metabolic process; F:carboxylic ester hydrolase activity                                                                                                                                                                                                                                                                                                                                                                                                                                                                                                                                                                                                                                                                                                                                                                                                                                                                                                                                                                                                                                               |
| GSSPFG00006843001-PA   | lipoyltransferase mitochondrial                        | 2  | F:GO:0003824; P:GO:0006464                                                                                                                                                                                                                                                                                                                                                                                                                                                   | F:catalytic activity; P:cellular protein modification process                                                                                                                                                                                                                                                                                                                                                                                                                                                                                                                                                                                                                                                                                                                                                                                                                                                                                                                                                                                                                                                                    |
| GSSPFG00005448001-PA   | math and lrr domain-containing protein pfe0570w-like   | 2  | F:GO:0097159; F:GO:1901363                                                                                                                                                                                                                                                                                                                                                                                                                                                   | F:organic cyclic compound binding; F:heterocyclic compound binding                                                                                                                                                                                                                                                                                                                                                                                                                                                                                                                                                                                                                                                                                                                                                                                                                                                                                                                                                                                                                                                               |
| GSSPFG00029683001-PA   | methionine--trna mitochondrial                         | 3  | F:GO:0000166; F:GO:0004812; P:GO:0006418                                                                                                                                                                                                                                                                                                                                                                                                                                     | F:nucleotide binding; F:aminoacyl-tRNA ligase activity; P:tRNA aminoacylation for protein translation                                                                                                                                                                                                                                                                                                                                                                                                                                                                                                                                                                                                                                                                                                                                                                                                                                                                                                                                                                                                                            |
| GSSPFG00028152001.3-PA | mitochondrial manganese superoxide dismutase           | 4  | F:GO:0004784; F:GO:0019430; F:GO:0046872; P:GO:0055114                                                                                                                                                                                                                                                                                                                                                                                                                       | F:superoxide dismutase activity; P:removal of superoxide radicals; F:metal ion binding; P:oxidation-reduction process                                                                                                                                                                                                                                                                                                                                                                                                                                                                                                                                                                                                                                                                                                                                                                                                                                                                                                                                                                                                            |
| GSSPFG00032551001-PA   | nad-dependent protein deacylase sirtuin- mitochondrial | 11 | C:GO:0005758; C:GO:0005759; C:GO:0005829; P:GO:0006476; F:GO:0008270; P:GO:0010566; P:GO:0036047; P:GO:0036049; F:GO:0036054; F:GO:0036055; F:GO:0070403                                                                                                                                                                                                                                                                                                                     | C:mitochondrial intermembrane space; C:mitochondrial matrix; C:cytosol; P:protein deacetylation; F:zinc ion binding; P:regulation of ketone biosynthetic process; P:peptidyl-lysine demalonylation; P:peptidyl-lysine desuccinylation; F:protein-malonyllysine demalonylase activity; F:protein-succinyllysine desuccinylase activity; F:NAD+ binding                                                                                                                                                                                                                                                                                                                                                                                                                                                                                                                                                                                                                                                                                                                                                                            |
| GSSPFG00000123001.3-PA | nedd2-like caspase                                     | 3  | F:GO:0004197; P:GO:0006508; P:GO:0042981                                                                                                                                                                                                                                                                                                                                                                                                                                     | F:cysteine-type endopeptidase activity; P:proteolysis; P:regulation of apoptotic process                                                                                                                                                                                                                                                                                                                                                                                                                                                                                                                                                                                                                                                                                                                                                                                                                                                                                                                                                                                                                                         |
| GSSPFG00010594001-PA   | neurexin-4 isoform x2                                  | 4  | F:GO:0000287; P:GO:0008152; F:GO:0008897; C:GO:0016021                                                                                                                                                                                                                                                                                                                                                                                                                       | F:magnesium ion binding; P:metabolic process; F:holo-[acyl-carrier-protein] synthase activity; C:integral component of membrane                                                                                                                                                                                                                                                                                                                                                                                                                                                                                                                                                                                                                                                                                                                                                                                                                                                                                                                                                                                                  |
| GSSPFG00026778001-PA   | neuronal pas domain-containing protein 4-like          | 7  | F:GO:0003677; F:GO:0004812; F:GO:0005524; C:GO:0005634; P:GO:0006355; P:GO:0006418; F:GO:0046983                                                                                                                                                                                                                                                                                                                                                                             | F:DNA binding; F:aminoacyl-tRNA ligase activity; F:ATP binding; C:nucleus; P:regulation of transcription, DNA-templated; P:tRNA aminoacylation for protein translation; P:protein dimerization activity                                                                                                                                                                                                                                                                                                                                                                                                                                                                                                                                                                                                                                                                                                                                                                                                                                                                                                                          |
| GSSPFG00025843001-PA   | nuclear pore complex protein nup107                    | 2  | C:GO:0005643; P:GO:0006810                                                                                                                                                                                                                                                                                                                                                                                                                                                   | C:nuclear pore; P:transport                                                                                                                                                                                                                                                                                                                                                                                                                                                                                                                                                                                                                                                                                                                                                                                                                                                                                                                                                                                                                                                                                                      |
| GSSPFG00017351001-PA   | organic cation transporter                             | 3  | F:GO:0005215; C:GO:0016021; P:GO:0055085                                                                                                                                                                                                                                                                                                                                                                                                                                     | F:transporter activity; C:integral component of membrane; P:transmembrane transport                                                                                                                                                                                                                                                                                                                                                                                                                                                                                                                                                                                                                                                                                                                                                                                                                                                                                                                                                                                                                                              |
| GSSPFG00008376001-PA   | pancreatic triacylglycerol lipase-like                 | 3  | C:GO:0005576; P:GO:0008152; F:GO:0052689                                                                                                                                                                                                                                                                                                                                                                                                                                     | C:extracellular region; P:metabolic process; F:carboxylic ester hydrolase activity                                                                                                                                                                                                                                                                                                                                                                                                                                                                                                                                                                                                                                                                                                                                                                                                                                                                                                                                                                                                                                               |
| GSSPFG00022738001-PA   | pancreatic triacylglycerol lipase-like                 | 3  | C:GO:0005576; P:GO:0008152; F:GO:0052689                                                                                                                                                                                                                                                                                                                                                                                                                                     | C:extracellular region; P:metabolic process; F:carboxylic ester hydrolase activity                                                                                                                                                                                                                                                                                                                                                                                                                                                                                                                                                                                                                                                                                                                                                                                                                                                                                                                                                                                                                                               |
| GSSPFG00009950001-PA   | pancreatic triacylglycerol lipase-like                 | 3  | C:GO:0005576; P:GO:0008152; F:GO:0052689                                                                                                                                                                                                                                                                                                                                                                                                                                     | C:extracellular region; P:metabolic process; F:carboxylic ester hydrolase activity                                                                                                                                                                                                                                                                                                                                                                                                                                                                                                                                                                                                                                                                                                                                                                                                                                                                                                                                                                                                                                               |
| GSSPFG00005108001-PA   | pancreatic triacylglycerol lipase-like                 | 3  | C:GO:0005576; P:GO:0008152; F:GO:0052689                                                                                                                                                                                                                                                                                                                                                                                                                                     | C:extracellular region; P:metabolic process; F:carboxylic ester hydrolase activity                                                                                                                                                                                                                                                                                                                                                                                                                                                                                                                                                                                                                                                                                                                                                                                                                                                                                                                                                                                                                                               |
| GSSPFG00005109001-PA   | pancreatic triacylglycerol lipase-like                 | 3  | C:GO:0005576; P:GO:0008152; F:GO:0052689                                                                                                                                                                                                                                                                                                                                                                                                                                     | C:extracellular region; P:metabolic process; F:carboxylic ester hydrolase activity                                                                                                                                                                                                                                                                                                                                                                                                                                                                                                                                                                                                                                                                                                                                                                                                                                                                                                                                                                                                                                               |
| GSSPFG00003126001.3-PA | partial                                                | 3  | F:GO:0003700; P:GO:0006355; F:GO:0043565                                                                                                                                                                                                                                                                                                                                                                                                                                     | F:DNA-binding transcription factor activity; P:regulation of transcription, DNA-templated; F:sequence-specific DNA binding                                                                                                                                                                                                                                                                                                                                                                                                                                                                                                                                                                                                                                                                                                                                                                                                                                                                                                                                                                                                       |
| GSSPFG00013063001-PA   | peroxisomal multifunctional enzyme type 2              | 4  | F:GO:0004303; C:GO:0005777; C:GO:0005811; P:GO:0055114                                                                                                                                                                                                                                                                                                                                                                                                                       | F:estradiol 17-beta-dehydrogenase activity; C:peroxisome; C:lipid droplet; P:oxidation-reduction process                                                                                                                                                                                                                                                                                                                                                                                                                                                                                                                                                                                                                                                                                                                                                                                                                                                                                                                                                                                                                         |
| GSSPFG00026320001-PA   | phosphatidate mitochondrial                            | 4  | C:GO:0005739; P:GO:0008654; C:GO:0016020; F:GO:0016779                                                                                                                                                                                                                                                                                                                                                                                                                       | C:mitochondrion; P:phospholipid biosynthetic process; C:membrane; F:nucleotidyltransferase activity                                                                                                                                                                                                                                                                                                                                                                                                                                                                                                                                                                                                                                                                                                                                                                                                                                                                                                                                                                                                                              |
| GSSPFG00029413001-PA   | poly-specific endoribonuclease homolog                 | 4  | P:GO:0008152; F:GO:0016788; F:GO:0097159; F:GO:1901363                                                                                                                                                                                                                                                                                                                                                                                                                       | P:metabolic process; F:hydrolase activity, acting on ester bonds; F:organic cyclic compound binding; F:heterocyclic compound binding                                                                                                                                                                                                                                                                                                                                                                                                                                                                                                                                                                                                                                                                                                                                                                                                                                                                                                                                                                                             |
| GSSPFG00016195001-PA   | polyubiquitin-b isoform x1                             | 33 | F:GO:0002020; F:GO:0003723; C:GO:0005615; C:GO:0005634; C:GO:0005739; P:GO:0006511; P:GO:0007141; P:GO:0007144; P:GO:0008585; P:GO:0010992; P:GO:0021888; F:GO:0031386; P:GO:0031397; P:GO:0032020; P:GO:0032649; P:GO:0034340; P:GO:0042742; C:GO:0043005; C:GO:0043025; C:GO:0043209; P:GO:0045071; P:GO:0045648; P:GO:0047497; P:GO:0048812; P:GO:0051607; P:GO:0051881; P:GO:0060613; P:GO:0061136; C:GO:0070062; P:GO:0072520; P:GO:0097009; P:GO:1901214; P:GO:1902255 | F:protease binding; F:RNA binding; C:extracellular space; C:nucleus; C:mitochondrion; P:ubiquitin-dependent protein catabolic process; P:meiosis I; P:female meiosis I; P:female gonad development; P:ubiquitin recycling; P:hypothalamus gonadotrophin-releasing hormone neuron development; P:protein tag; P:negative regulation of protein ubiquitination; P:ISG15-protein conjugation; P:regulation of interferon-gamma production; P:response to type I interferon; P:defense response to bacterium; C:neuron projection; C:neuronal cell body; C:myelin sheath; P:negative regulation of viral genome replication; P:positive regulation of erythrocyte differentiation; P:mitochondrion transport along microtubule; P:neuron projection morphogenesis; P:defense response to virus; P:regulation of mitochondrial membrane potential; P:fat pad development; P:regulation of proteasomal protein catabolic process; C:extracellular exosome; P:seminiferous tubule development; P:energy homeostasis; P:regulation of neuron death; P:positive regulation of intrinsic apoptotic signaling pathway by p53 class mediator |
| GSSPFG00018941001-PA   | probable chitinase 3                                   | 5  | F:GO:0004568; C:GO:0005576; P:GO:0005975; P:GO:0006032; F:GO:0008061                                                                                                                                                                                                                                                                                                                                                                                                         | F:chitinase activity; C:extracellular region; P:carbohydrate metabolic process; P:chitin catabolic process; F:chitin binding                                                                                                                                                                                                                                                                                                                                                                                                                                                                                                                                                                                                                                                                                                                                                                                                                                                                                                                                                                                                     |
| GSSPFG00002398001-PA   | prolactin-releasing peptide receptor-like              | 3  | F:GO:0004983; P:GO:0007218; C:GO:0016021                                                                                                                                                                                                                                                                                                                                                                                                                                     | F:neuropeptide Y receptor activity; P:neuropeptide signaling pathway; C:integral component of membrane                                                                                                                                                                                                                                                                                                                                                                                                                                                                                                                                                                                                                                                                                                                                                                                                                                                                                                                                                                                                                           |
| GSSPFG00009775001.1-PA | prostaglandin reductase 1-like                         | 3  | F:GO:0008270; F:GO:0016491; P:GO:0055114                                                                                                                                                                                                                                                                                                                                                                                                                                     | F:zinc ion binding; F:oxidoreductase activity; P:oxidation-reduction process                                                                                                                                                                                                                                                                                                                                                                                                                                                                                                                                                                                                                                                                                                                                                                                                                                                                                                                                                                                                                                                     |
| GSSPFG00009778001.1-PA | prostaglandin reductase 1-like                         | 3  | F:GO:0008270; F:GO:0016491; P:GO:0055114                                                                                                                                                                                                                                                                                                                                                                                                                                     | F:zinc ion binding; F:oxidoreductase activity; P:oxidation-reduction process                                                                                                                                                                                                                                                                                                                                                                                                                                                                                                                                                                                                                                                                                                                                                                                                                                                                                                                                                                                                                                                     |
| GSSPFG00033418001-PA   | protein ddi1 homolog 2                                 | 2  | F:GO:0004190; P:GO:0006508                                                                                                                                                                                                                                                                                                                                                                                                                                                   | F:aspartic-type endopeptidase activity; P:proteolysis                                                                                                                                                                                                                                                                                                                                                                                                                                                                                                                                                                                                                                                                                                                                                                                                                                                                                                                                                                                                                                                                            |
| GSSPFG00033586001-PA   | protein roadkill isoform x3                            | 12 | C:GO:0005634; P:GO:0007349; P:GO:0016567; P:GO:0030162; P:GO:0031648; P:GO:0042067; P:GO:0042308; F:GO:0042803; P:GO:0043065; P:GO:0045879; P:GO:0046330; P:GO:0046331                                                                                                                                                                                                                                                                                                       | C:nucleus; P:cellularization; P:protein ubiquitination; P:regulation of proteolysis; P:protein destabilization; P:establishment of ommatidial planar polarity; P:negative regulation of protein import into nucleus; F:protein homodimerization activity; P:positive regulation of apoptotic process; P:negative regulation of smoothened signaling pathway; P:positive regulation of JNK cascade; P:lateral inhibition                                                                                                                                                                                                                                                                                                                                                                                                                                                                                                                                                                                                                                                                                                          |
| GSSPFG00007550001-PA   | protein vav isoform x1                                 | 5  | F:GO:0005089; C:GO:0005622; P:GO:0035023; P:GO:0043547; F:GO:0046872                                                                                                                                                                                                                                                                                                                                                                                                         | F:Rho guanyl-nucleotide exchange factor activity; C:intracellular; P:regulation of Rho protein signal transduction; P:positive regulation of GTPase activity; F:metal ion binding                                                                                                                                                                                                                                                                                                                                                                                                                                                                                                                                                                                                                                                                                                                                                                                                                                                                                                                                                |
| GSSPFG00016017001-PA   | proton-coupled folate transporter-like                 | 2  | C:GO:0016021; P:GO:0055085                                                                                                                                                                                                                                                                                                                                                                                                                                                   | C:integral component of membrane; P:transmembrane transport                                                                                                                                                                                                                                                                                                                                                                                                                                                                                                                                                                                                                                                                                                                                                                                                                                                                                                                                                                                                                                                                      |
| GSSPFG00000597001-PA   | rab gdp dissociation inhibitor alpha                   | 8  | F:GO:0005093; C:GO:0005829; C:GO:0005875; P:GO:0007269; C:GO:0008021; P:GO:0015031; P:GO:0016192; P:GO:0050790                                                                                                                                                                                                                                                                                                                                                               | F:Rab GDP-dissociation inhibitor activity; C:cytosol; C:microtubule associated complex; P:neurotransmitter secretion; C:synaptic vesicle; P:protein transport; P:vesicle-mediated transport; P:regulation of catalytic activity                                                                                                                                                                                                                                                                                                                                                                                                                                                                                                                                                                                                                                                                                                                                                                                                                                                                                                  |
| GSSPFG00000598001-PA   | rab gdp-dissociation inhibitor                         | 3  | F:GO:0005093; P:GO:0015031; P:GO:0050790                                                                                                                                                                                                                                                                                                                                                                                                                                     | F:Rab GDP-dissociation inhibitor activity; P:protein transport; P:regulation of catalytic activity                                                                                                                                                                                                                                                                                                                                                                                                                                                                                                                                                                                                                                                                                                                                                                                                                                                                                                                                                                                                                               |
| GSSPFG00017853001-PA   | seminal fluid protein haccp038                         | 2  | F:GO:0004252; P:GO:0006508                                                                                                                                                                                                                                                                                                                                                                                                                                                   | F:serine-type endopeptidase activity; P:proteolysis                                                                                                                                                                                                                                                                                                                                                                                                                                                                                                                                                                                                                                                                                                                                                                                                                                                                                                                                                                                                                                                                              |

|                        |                                                                                 |    |                                                                                                                                                                                                                  |                                                                                                                                                                                                                                                                                                                                                                                                        |
|------------------------|---------------------------------------------------------------------------------|----|------------------------------------------------------------------------------------------------------------------------------------------------------------------------------------------------------------------|--------------------------------------------------------------------------------------------------------------------------------------------------------------------------------------------------------------------------------------------------------------------------------------------------------------------------------------------------------------------------------------------------------|
| GSSPFG00018308001-PA   | septin isoform b                                                                | 15 | P:GO:0000281; F:GO:0003746; F:GO:0003924; F:GO:0005525; C:GO:0005875; C:GO:0005940; P:GO:0006414; P:GO:0007295; P:GO:0007349; P:GO:0007444; P:GO:0022008; C:GO:0031105; F:GO:0042803; C:GO:0045172; P:GO:0051726 | P:mitotic cytokinesis; F:translation elongation factor activity; F:GTPase activity; F:GTP binding; C:microtubule associated complex; C:septin ring; P:translational elongation; P:growth of a germlarium-derived egg chamber; P:cellularization; P:imaginal disc development; P:neurogenesis; C:septin complex; F:protein homodimerization activity; C:germline ring canal; P:regulation of cell cycle |
| GSSPFG00023708001.3-PA | serine threonine-protein kinase pelle                                           | 4  | F:GO:0004674; F:GO:0005524; P:GO:0006468; P:GO:0007165                                                                                                                                                           | F:protein serine/threonine kinase activity; F:ATP binding; P:protein phosphorylation; P:signal transduction                                                                                                                                                                                                                                                                                            |
| GSSPFG00022767001-PA   | set1 ash2 histone methyltransferase complex subunit ash2                        | 3  | F:GO:0008168; F:GO:0008270; P:GO:0032259                                                                                                                                                                         | F:methyltransferase activity; F:zinc ion binding; P:methylation                                                                                                                                                                                                                                                                                                                                        |
| GSSPFG00029484001-PA   | signal-induced proliferation-associated 1-like protein 2 isoform x2             | 3  | F:GO:0005096; P:GO:0043547; P:GO:0051056                                                                                                                                                                         | F:GTPase activator activity; P:positive regulation of GTPase activity; P:regulation of small GTPase mediated signal transduction                                                                                                                                                                                                                                                                       |
| GSSPFG00002106001.3-PA | slit homolog 1 protein                                                          | 5  | P:GO:0007165; P:GO:0008152; C:GO:0016021; F:GO:0016787; P:GO:0045087                                                                                                                                             | P:signal transduction; P:metabolic process; C:integral component of membrane; F:hydrolase activity; P:innate immune response                                                                                                                                                                                                                                                                           |
| GSSPFG00029082001.6-PA | small heat shock protein                                                        | 2  | F:GO:0005212; C:GO:0005840                                                                                                                                                                                       | F:structural constituent of eye lens; C:ribosome                                                                                                                                                                                                                                                                                                                                                       |
| GSSPFG00031268001-PA   | splicing factor 3b subunit 6-like protein                                       | 2  | F:GO:0000166; F:GO:0003676                                                                                                                                                                                       | F:nucleotide binding; F:nucleic acid binding                                                                                                                                                                                                                                                                                                                                                           |
| GSSPFG00018170001-PA   | sterol carrier protein 2 3-oxoacyl- thiolase                                    | 7  | F:GO:0005548; C:GO:0005739; C:GO:0005777; C:GO:0005811; P:GO:0008152; P:GO:0015914; F:GO:0016747                                                                                                                 | F:phospholipid transporter activity; C:mitochondrion; C:peroxisome; C:lipid droplet; P:metabolic process; P:phospholipid transport; F:transferase activity, transferring acyl groups other than amino-acyl groups                                                                                                                                                                                      |
| GSSPFG00007548001-PA   | sulfiredoxin-1 isoform x1                                                       | 3  | F:GO:0005524; F:GO:0032542; P:GO:0055114                                                                                                                                                                         | F:ATP binding; F:sulfiredoxin activity; P:oxidation-reduction process                                                                                                                                                                                                                                                                                                                                  |
| GSSPFG00013592001.3-PA | superoxide dismutase                                                            | 5  | F:GO:0004784; C:GO:0005737; P:GO:0019430; F:GO:0046872; P:GO:0055114                                                                                                                                             | F:superoxide dismutase activity; C:cyttoplasm; P:removal of superoxide radicals; F:metal ion binding; P:oxidation-reduction process                                                                                                                                                                                                                                                                    |
| GSSPFG00011227001-PA   | synaptic vesicle glycoprotein 2b                                                | 4  | F:GO:0008270; C:GO:0016021; F:GO:0022857; P:GO:0055085                                                                                                                                                           | F:zinc ion binding; C:integral component of membrane; F:transmembrane transporter activity; P:transmembrane transport                                                                                                                                                                                                                                                                                  |
| GSSPFG00026383001-PA   | taf6-like rna polymerase ii p300 cbp-associated factor-associated factor 65 kdi | 5  | C:GO:0005634; P:GO:0006325; P:GO:0006352; F:GO:0046982; P:GO:1903506                                                                                                                                             | C:nucleus; P:chromatin organization; P:DNA-templated transcription, initiation; F:protein heterodimerization activity; P:regulation of nucleic acid-templated transcription                                                                                                                                                                                                                            |
| GSSPFG00017370001-PA   | telomerase reverse transcriptase                                                | 2  | F:GO:0003964; P:GO:0006278                                                                                                                                                                                       | F:RNA-directed DNA polymerase activity; P:RNA-dependent DNA biosynthetic process                                                                                                                                                                                                                                                                                                                       |
| GSSPFG00001034001-PA   | topoisomerase partial                                                           | 5  | F:GO:0003677; F:GO:0003917; F:GO:0003918; C:GO:0005694; P:GO:0006265                                                                                                                                             | F:DNA binding; F:DNA topoisomerase type I activity; F:DNA topoisomerase type II (ATP-hydrolyzing) activity; C:chromosome; P:DNA topological change                                                                                                                                                                                                                                                     |
| GSSPFG00015808001-PA   | transcription factor dp-1                                                       | 6  | F:GO:0003677; F:GO:0003700; C:GO:0005634; C:GO:0005667; P:GO:0006355; P:GO:0007049                                                                                                                               | F:DNA binding; F:DNA-binding transcription factor activity; C:nucleus; C:transcription factor complex; P:regulation of transcription, DNA-templated; P:cell cycle                                                                                                                                                                                                                                      |
| GSSPFG00021500001.3-PA | transforming growth factor beta-1-induced transcript 1 protein                  | 1  | F:GO:0008270                                                                                                                                                                                                     | F:zinc ion binding                                                                                                                                                                                                                                                                                                                                                                                     |
| GSSPFG00024425001.3-PA | transforming growth factor beta-1-induced transcript 1 protein                  | 1  | F:GO:0008270                                                                                                                                                                                                     | F:zinc ion binding                                                                                                                                                                                                                                                                                                                                                                                     |
| GSSPFG00012665001-PA   | translocon-associated protein subunit gamma                                     | 3  | C:GO:0005784; P:GO:0006613; C:GO:0030176                                                                                                                                                                         | C:Sec61 translocon complex; P:cotranslational protein targeting to membrane; C:integral component of endoplasmic reticulum membrane                                                                                                                                                                                                                                                                    |
| GSSPFG00024304001-PA   | transmembrane protein 14c                                                       | 1  | C:GO:0016021                                                                                                                                                                                                     | C:integral component of membrane                                                                                                                                                                                                                                                                                                                                                                       |
| GSSPFG00001387001.3-PA | trypsin-like protease                                                           | 1  | F:GO:0016787                                                                                                                                                                                                     | F:hydrolase activity                                                                                                                                                                                                                                                                                                                                                                                   |
| GSSPFG00030048001.3-PA | trypsin-like serine protease                                                    | 2  | F:GO:0004252; P:GO:0006508                                                                                                                                                                                       | F:serine-type endopeptidase activity; P:proteolysis                                                                                                                                                                                                                                                                                                                                                    |
| GSSPFG00028489001.5-PA | trypsin-like serine proteinase t26                                              | 2  | F:GO:0005515; F:GO:0008233                                                                                                                                                                                       | F:protein binding; F:peptidase activity                                                                                                                                                                                                                                                                                                                                                                |
| GSSPFG00026411001-PA   | tyrosine aminotransferase                                                       | 4  | F:GO:0004838; P:GO:0009058; P:GO:0009072; F:GO:0030170                                                                                                                                                           | F:L-tyrosine:2-oxoglutarate aminotransferase activity; P:biosynthetic process; P:aromatic amino acid family metabolic process; F:pyridoxal phosphate binding                                                                                                                                                                                                                                           |
| GSSPFG00004237001-PA   | u7 snrna-associated sm-like protein lsm10                                       | 1  | C:GO:0005634                                                                                                                                                                                                     | C:nucleus                                                                                                                                                                                                                                                                                                                                                                                              |
| GSSPFG00023353001-PA   | uncharacterized protein loc101456014                                            | 8  | P:GO:0002121; F:GO:0005089; P:GO:0007411; P:GO:0007480; P:GO:0035025; P:GO:0035277; P:GO:0043547; C:GO:0045179                                                                                                   | P:inter-male aggressive behavior; F:Rho guanyl-nucleotide exchange factor activity; P:axon guidance; P:imaginal disc-derived leg morphogenesis; P:positive regulation of Rho protein signal transduction; P:spiracle morphogenesis, open tracheal system; P:positive regulation of GTPase activity; C:apical cortex                                                                                    |
| GSSPFG00007846001-PA   | uncharacterized protein loc105389112                                            | 3  | F:GO:0016301; P:GO:0016310; F:GO:0043168                                                                                                                                                                         | F:kinase activity; P:phosphorylation; F:anion binding                                                                                                                                                                                                                                                                                                                                                  |
| GSSPFG00000520001-PA   | uncharacterized protein partial                                                 | 2  | F:GO:0005319; P:GO:0006869                                                                                                                                                                                       | F:lipid transporter activity; P:lipid transport                                                                                                                                                                                                                                                                                                                                                        |
| GSSPFG00025800001-PA   | uv excision repair protein rad23 homolog b                                      | 4  | F:GO:0003684; C:GO:0005634; P:GO:0006289; P:GO:0043161                                                                                                                                                           | F:damaged DNA binding; C:nucleus; P:nucleotide-excision repair; P:proteasome-mediated ubiquitin-dependent protein catabolic process                                                                                                                                                                                                                                                                    |
| GSSPFG00034417001-PA   | uv opsin                                                                        | 7  | F:GO:0004930; P:GO:0007186; P:GO:0007601; P:GO:0007602; F:GO:0009881; C:GO:0016021; P:GO:0018298                                                                                                                 | F:G protein-coupled receptor activity; P:G protein-coupled receptor signaling pathway; P:visual perception; P:phototransduction; F:photoreceptor activity; C:integral component of membrane; P:protein-chromophore linkage                                                                                                                                                                             |
| GSSPFG00014231001-PA   | v-type proton atpase subunit e                                                  | 4  | P:GO:0008152; P:GO:0015991; C:GO:0033178; F:GO:0046961                                                                                                                                                           | P:metabolic process; P:ATP hydrolysis coupled proton transport; C:proton-transporting two-sector ATPase complex, catalytic domain; F:proton-transporting ATPase activity, rotational mechanism                                                                                                                                                                                                         |
| GSSPFG00009112001-PA   | zinc finger protein 271-like                                                    | 1  | F:GO:0005488                                                                                                                                                                                                     | F:binding                                                                                                                                                                                                                                                                                                                                                                                              |
| GSSPFG00000957001-PA   | zinc finger protein 800 isoform x2                                              | 1  | F:GO:0005488                                                                                                                                                                                                     | F:binding                                                                                                                                                                                                                                                                                                                                                                                              |
