# Supplementary material for: Interaction of a Densovirus with Glycans of the Peritrophic Matrix Mediates Oral Infection of the Lepidopteran Pest Spodoptera frugiperda
Source: MDPI journal article supplement (doi:10.3390/v11090870), 2019-09-17
Supplement: s1 [file s1]

| DGE libraries | Number of Tags |
|---------------|----------------|
| Day 1 Mock    | 605378         |
| Day 1 JcDV    | 1753522        |
| Day 3 Mock    | 640390         |
| Day 3 JcDV    | 638945         |
