# Supplementary material for: Interaction of a Densovirus with Glycans of the Peritrophic Matrix Mediates Oral Infection of the Lepidopteran Pest Spodoptera frugiperda
Source: MDPI journal article supplement (doi:10.3390/v11090870), 2019-09-17
Supplement: s1 [file s1]

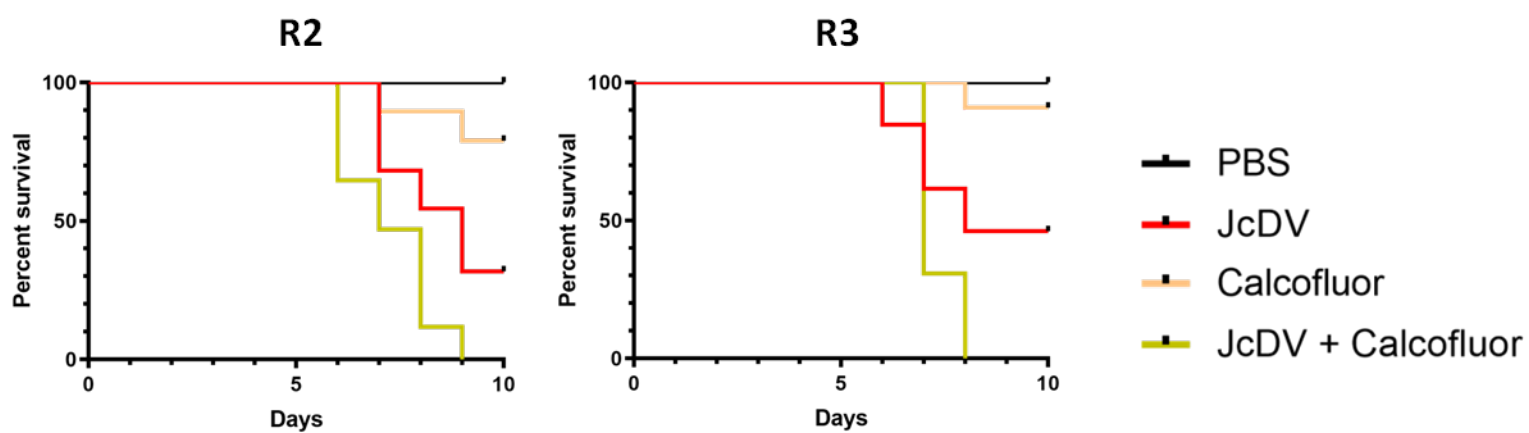

|    | Pairwise comparison       | Log-rank (Mantel-Cox)      | Gehan-Breslow-Wilcoxon     |
|----|---------------------------|----------------------------|----------------------------|
| R2 | JcDV + Calcofluor vs JcDV | <i>P</i> value = 0.0013 ** | <i>P</i> value = 0,0026 ** |
|    | Calcofluor vs JcDV        | <i>P</i> value = 0.0027 ** | <i>P</i> value = 0.0039 ** |
| R3 | JcDV + Calcofluor vs JcDV | <i>P</i> value = 0.0352 *  | <i>P</i> value = 0.1110 ns |
|    | Calcofluor vs JcDV        | <i>P</i> value = 0.0046 ** | <i>P</i> value = 0.0057 ** |
