# Supplementary material for: Interaction of a Densovirus with Glycans of the Peritrophic Matrix Mediates Oral Infection of the Lepidopteran Pest Spodoptera frugiperda
Source: MDPI journal article supplement (doi:10.3390/v11090870), 2019-09-17
Supplement: s1 [file s1]

| Number of                                                                    | Day 1<br>(Mock/JcDV) | Day 3<br>(Mock/JcDV) |
|------------------------------------------------------------------------------|----------------------|----------------------|
| Unique Tags ( <i>P</i> value<0.001)                                          | 8586                 | 6317                 |
| Tags differentially represented between<br>libraries (fold change $\geq 5$ ) | 190                  | 196                  |
| Up-represented transcripts<br>in JcDV condition                              | 66                   | 130                  |
| Down-represented transcripts<br>in JcDV condition                            | 28                   | 32                   |
