# Supplementary material for: Interaction of a Densovirus with Glycans of the Peritrophic Matrix Mediates Oral Infection of the Lepidopteran Pest Spodoptera frugiperda
Source: MDPI journal article supplement (doi:10.3390/v11090870), 2019-09-17
Supplement: s1 [file s1]

**B**

**DAY 1**  
**(Molecular function)**

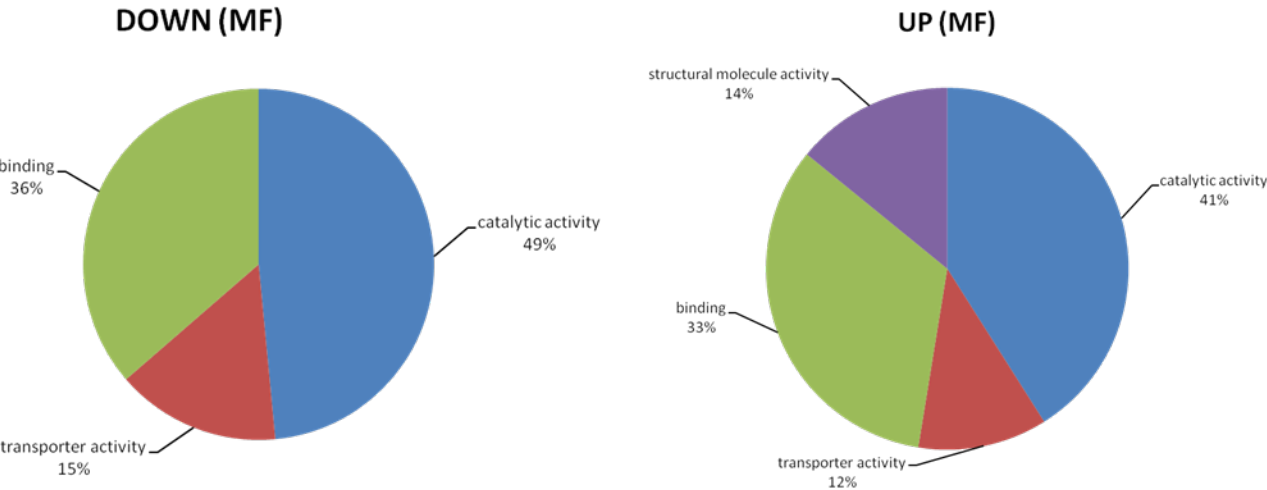

**DAY 3**  
**(Molecular function)**

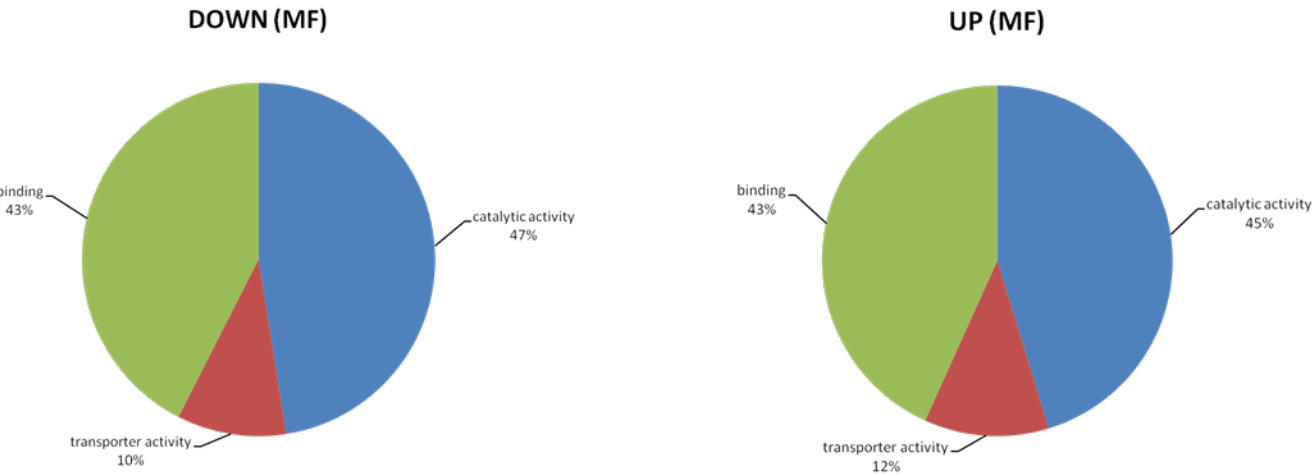

- catalytic activity
- transporter activity
- binding
- structural molecule activity
