# Supplementary figures and images for: Interaction of a Densovirus with Glycans of the Peritrophic Matrix Mediates Oral Infection of the Lepidopteran Pest Spodoptera frugiperda
Source: MDPI journal article supplement (doi:10.3390/v11090870), 2019-09-17

**C**

Infection by injection

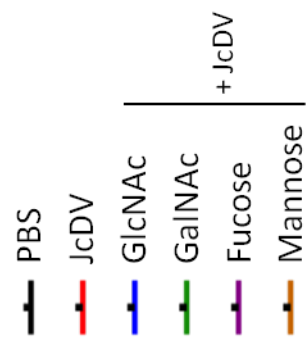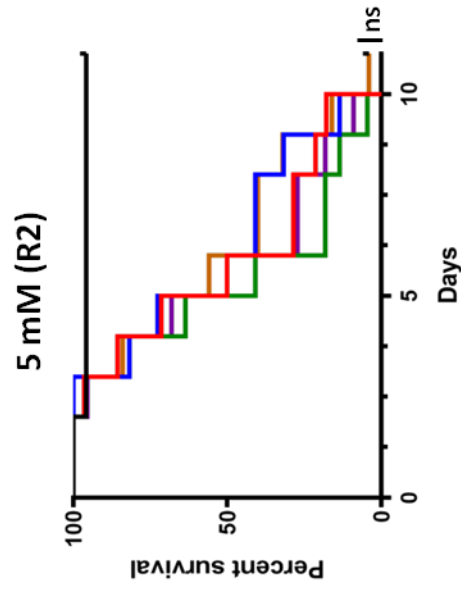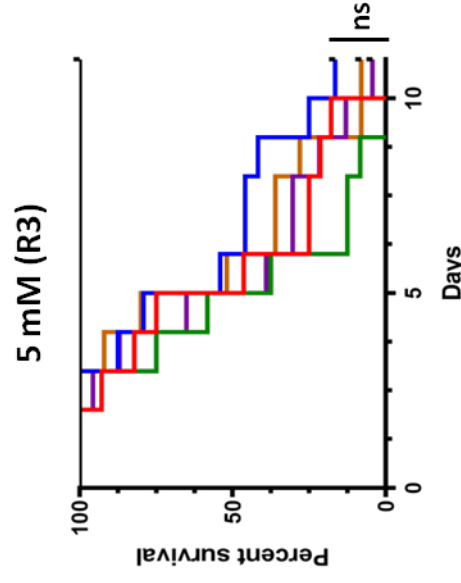

Supplement: s1 [file s1]

## DAY 1 (Biological process)

A

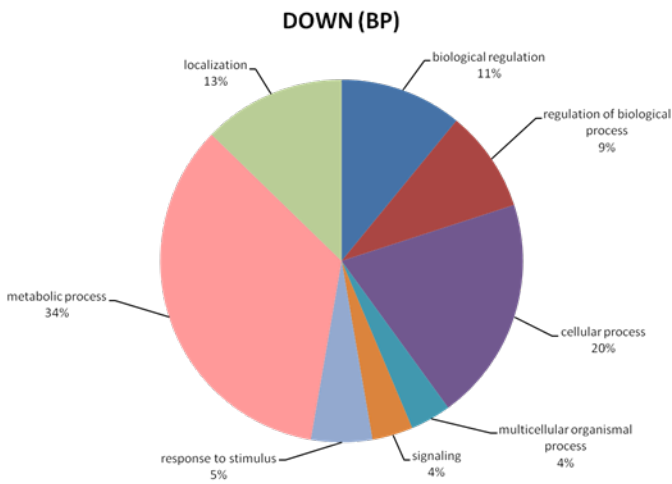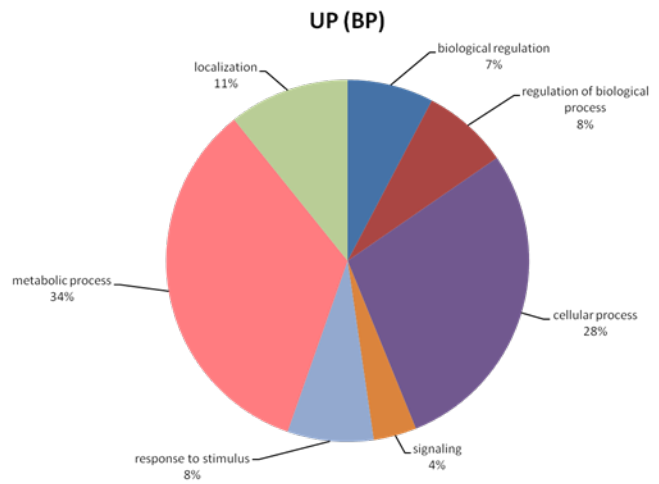

## DAY 3 (Biological process)

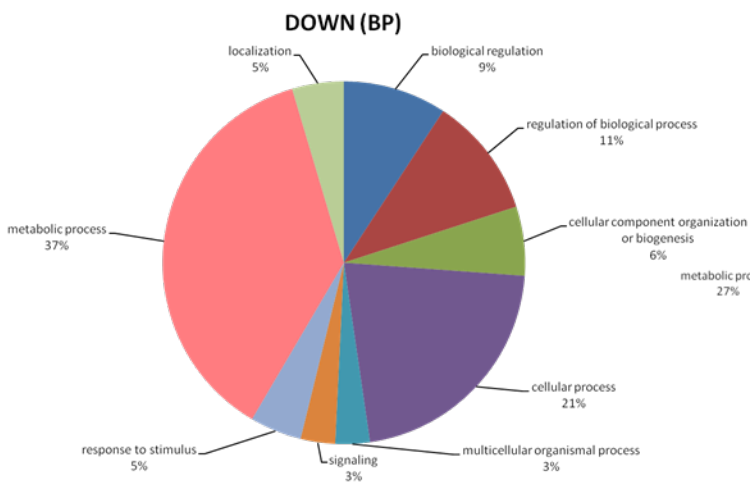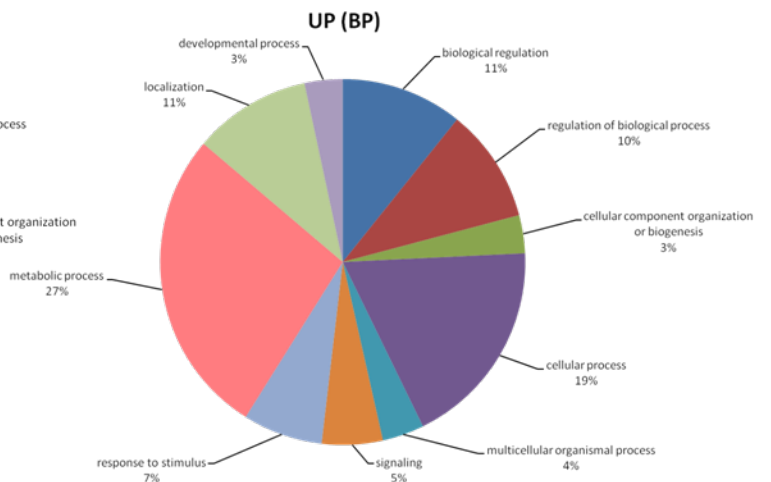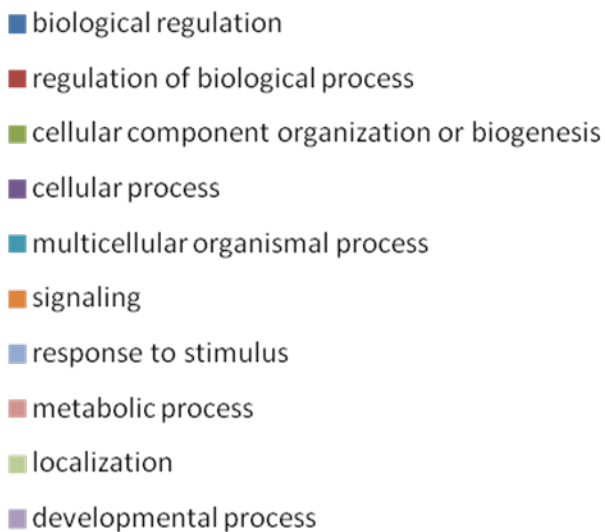

Supplement: s1 [file s1]

**A**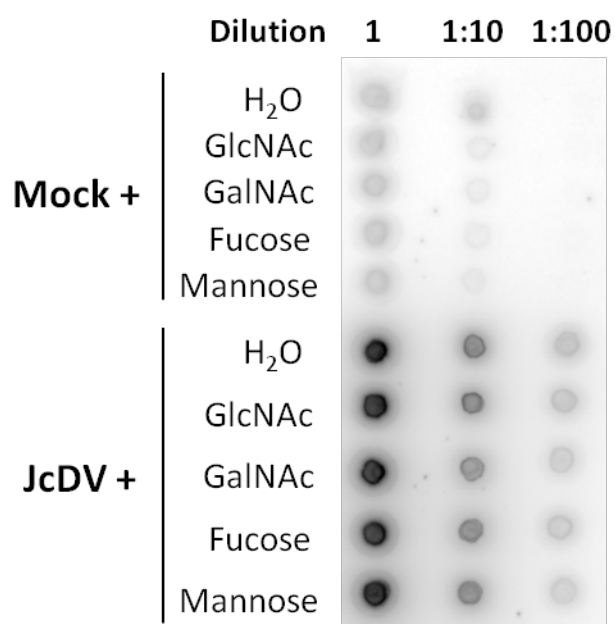**B**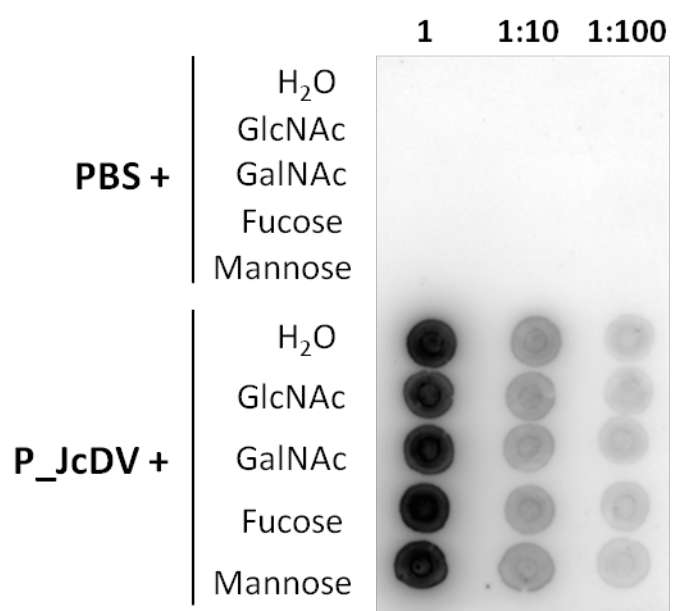

Supplement: s1 [file s1]
